# Supplementary material for: OsJAZ11 regulates phosphate starvation responses in rice
Source: PubMed Central journal article supplement (PMC8213676; doi:10.1007/s00425-021-03657-6), 2021-06-18
Supplement: 425_2021_3657_MOESM1_ESM.pdf [file 425_2021_3657_MOESM1_ESM.pdf]

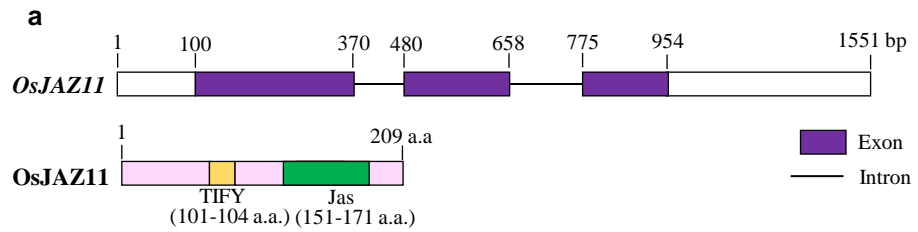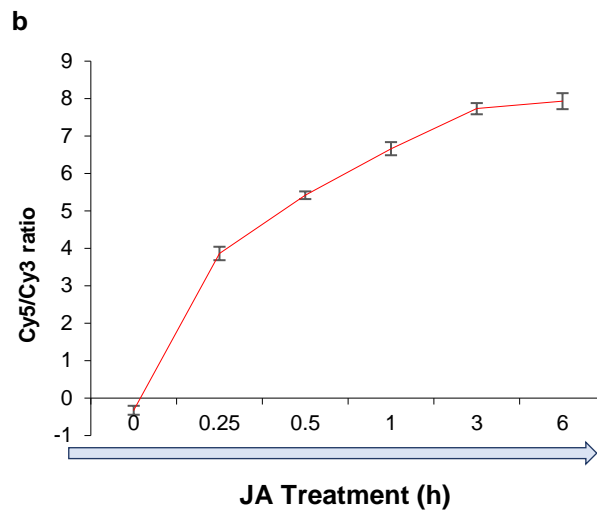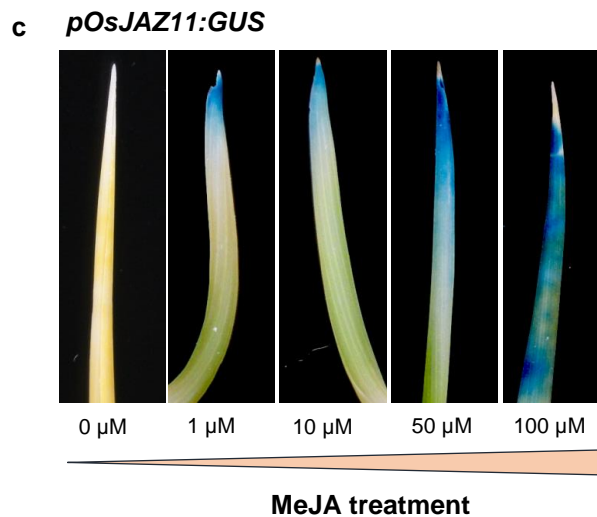

**Supplementary Fig. S1** *OsJAZ11* is a JA responsive gene. **a** Schematic representation of gene model of *OsJAZ11* (1551 bp) and open reading frame (ORF) (209 a.a.). Positions of intron/exons in gene structure (above panel) and motifs in ORF (below panel) have been indicated. **b** Expression profile of *OsJAZ11* retrieved from microarray database RiceXPro (Rice Expression Profile Database) version 3.0. Error bars represent standard deviation ( $n=3$ ). **c** Histochemical localization of GUS signals in coleoptiles of *pOsJAZ11:GUS* rice transgenics subjected to different doses of MeJA treatments (0, 1, 10, 50 and 100  $\mu$ M) for 1 h.

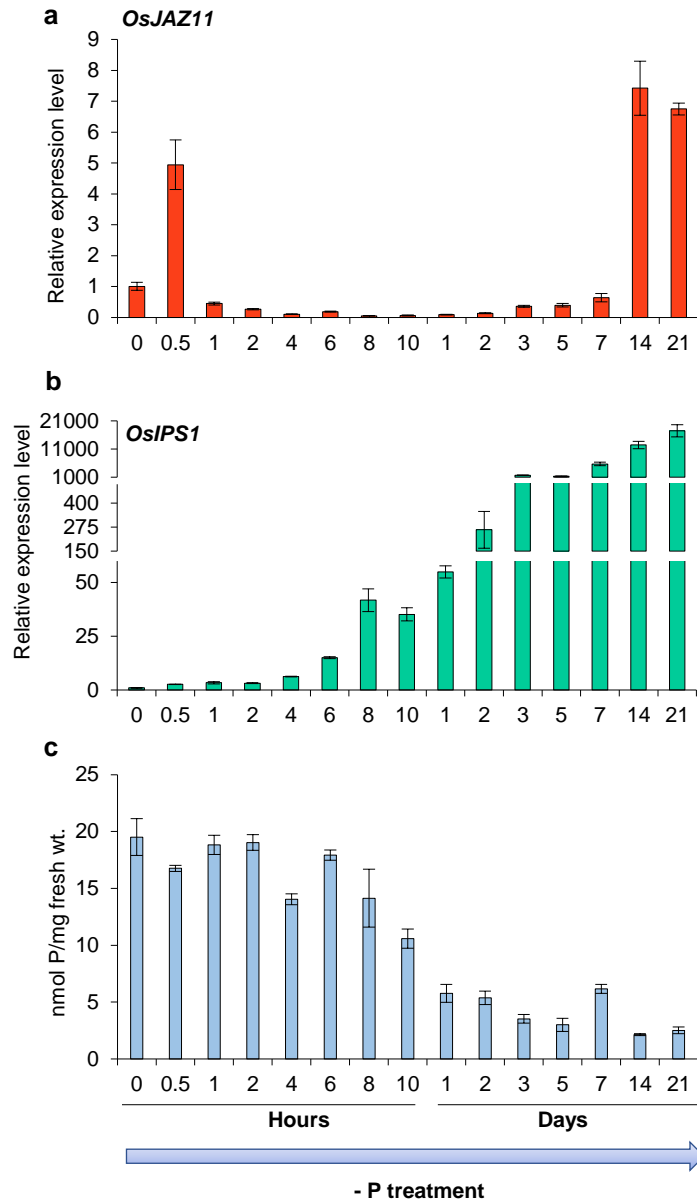

**Supplementary Fig. S2** *OsJAZ11* is induced by local and systemic Pi fluctuations. **a-b** Relative expression profiles of *OsJAZ11* and *OsIPS1* in roots of PB1 seedlings. Seven-day-old rice seedlings grown under +P conditions were transferred to -P conditions. *OsIPS1* was used as a marker gene to depict onset of Pi deficiency response at molecular levels. Gene expression levels were measured at indicated time points by RT-qPCR and fold changes were determined with respect to 0 time point. **c** Soluble Pi content in rice seedlings at time points corresponding to time points in panel **a** and **b**. Each bar represents mean of three independent replicates with standard error ( $n=3$ ).

**a** *OsJAZ11* OE construct

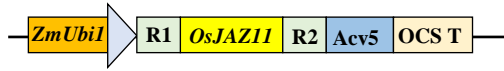

**b** *OsJAZ11* Ri construct

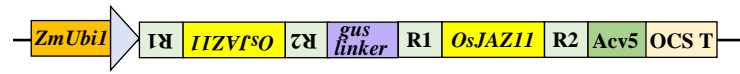

**c**

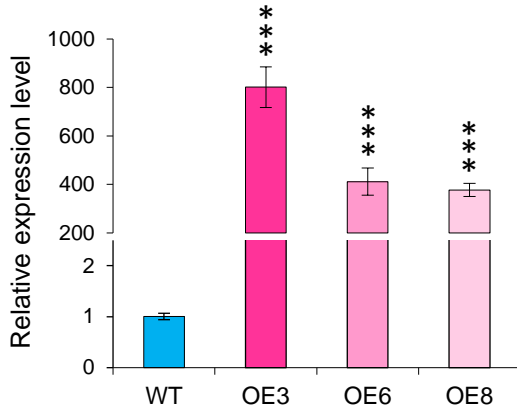

**d**

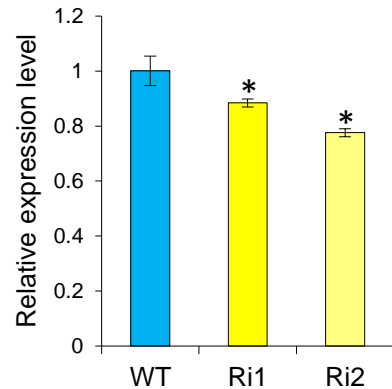

**Supplementary Fig. S3** Raising of *OsJAZ11* transgenics. **a** Schematic representation of *OsJAZ11* overexpression construct in Gateway-compatible destination vector, pANIC6B. *OsJAZ11* was overexpressed under maize *Ubiquitin* promoter (*ZmUbi1*). **b** Schematic representation of *OsJAZ11* silencing construct in Gateway-compatible destination vector, pANIC8B. *ZmUbi1* (maize ubiquitin 1 promoter and intron), R1 and R2 (*attR1* and *attR2* recombination sites), AcV5 (epitope tag), *OCS T* (octopine synthase terminator sequence). **c-d** Relative expression levels of *OsJAZ11* in roots of thirty-day-old *OsJAZ11* overexpression (OE) and RNAi (Ri) transgenics compared to WT. Each bar represents mean of three biological replicates with standard error. Significant differences between WT and transgenics were evaluated by Student's *t*-test. Asterisks; \* and \*\*\* indicate *P* values,  $\leq 0.05$  and 0.001, respectively ( $n=3$ ).

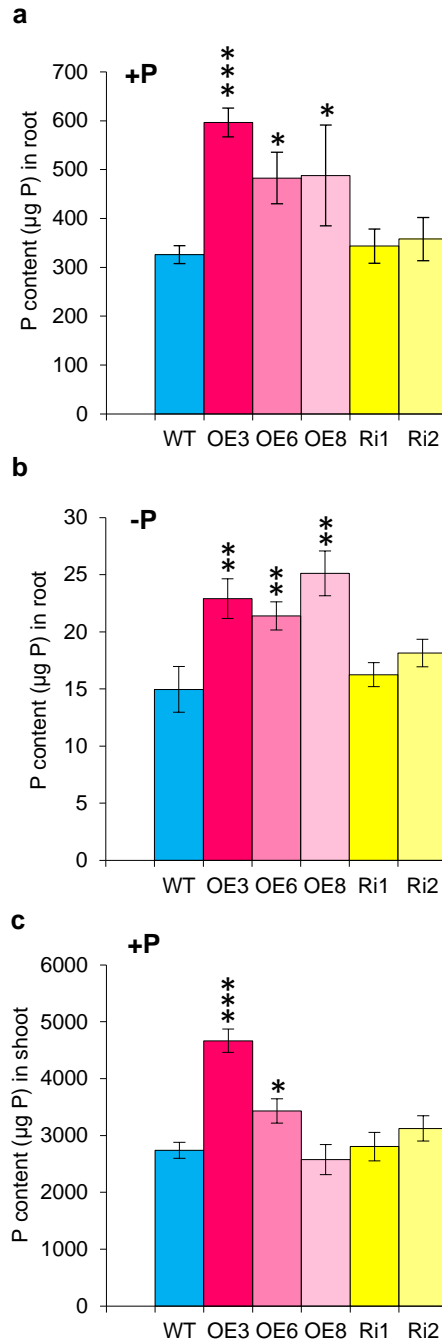

**Supplementary Fig. S4** *OsJAZ11* OE lines showed higher phosphorous uptake. **a-b** P content of roots of thirty-day-old plants of WT and *OsJAZ11* transgenics under +P and -P conditions. **c** P content of shoots of thirty-day-old plants of WT and *OsJAZ11* transgenics under +P conditions. Each bar displays means of ten biological replicates with standard error. Significant differences between WT and transgenics were determined by Student's *t*-test. Asterisks; \*, \*\* and \*\*\* indicate *P* values,  $\leq 0.05$ , 0.01 and 0.001, respectively ( $n=10$ ).

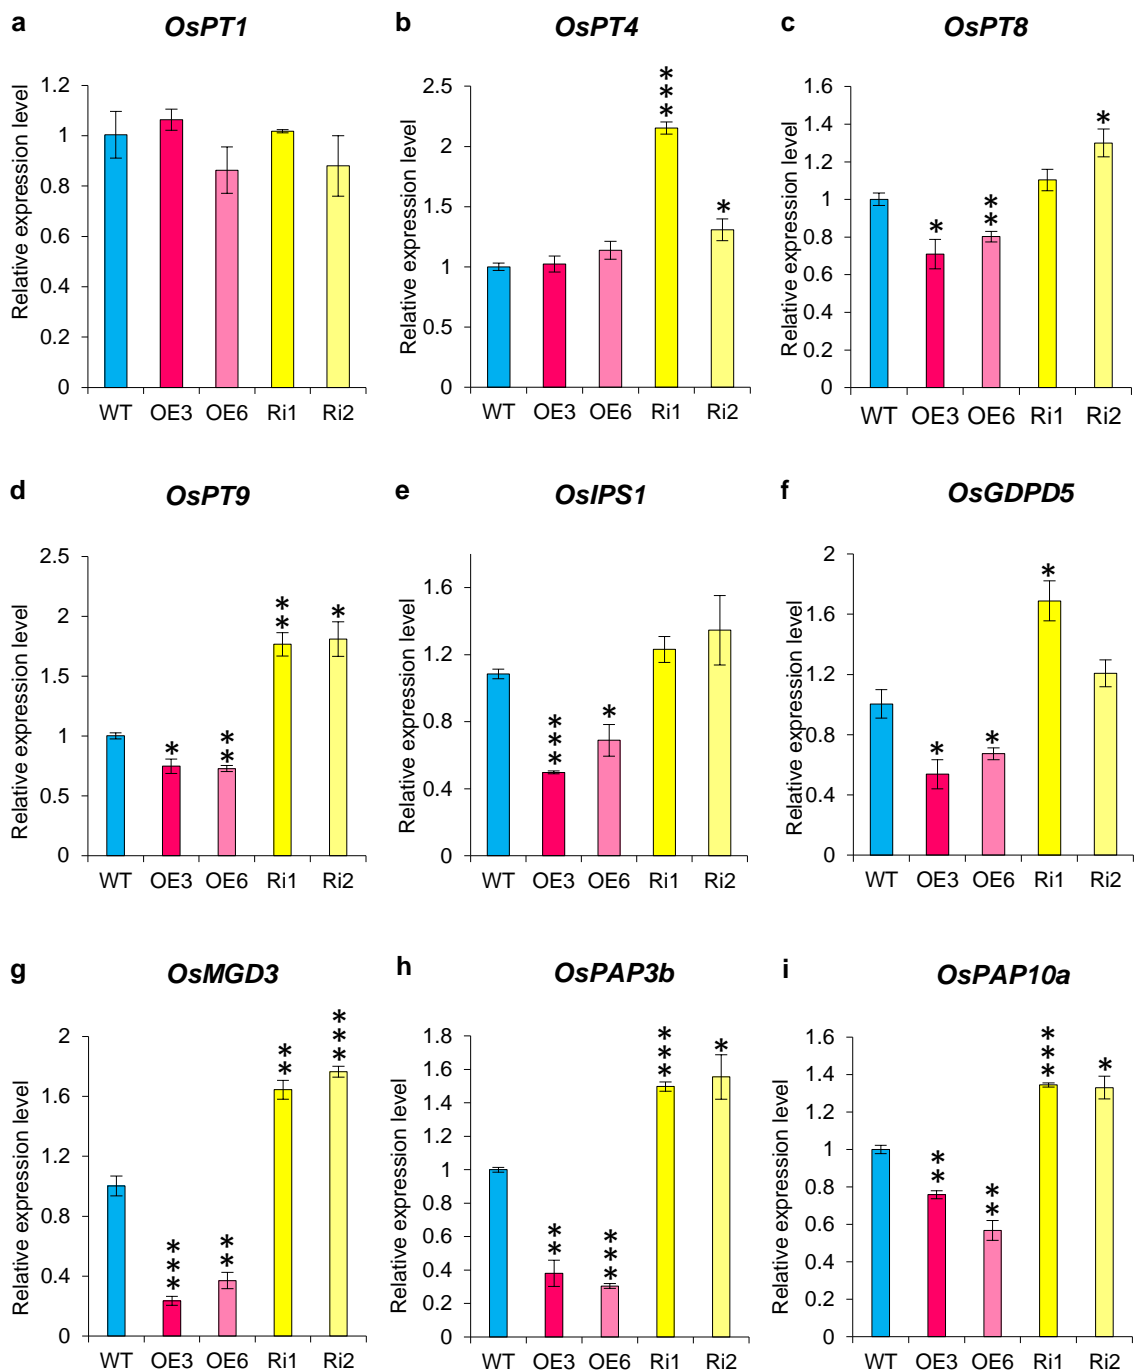

**Supplementary Fig. S5** *OsJAZ11* OE lines displayed suppressed phosphate starvation response (PSR). **a-i** Relative expression levels of low Pi marker genes *OsPT1*, *OsPT4*, *OsPT8*, *OsPT9*, *OsIPS1*, *OsGDPD5*, *OsMGD3*, *OsPAP3b* and *OsPAP10a*. Expression levels were measured by RT-qPCR in roots of thirty-day-old WT and *OsJAZ11* transgenics under Pi deficiency. Each bar displays means of three biological replicates with standard error. Significant differences between WT and transgenics were determined by Student's *t*-test. Asterisks; \*, \*\* and \*\*\* indicate *P* values,  $\leq 0.05$ , 0.01 and 0.001, respectively ( $n=3$ ).

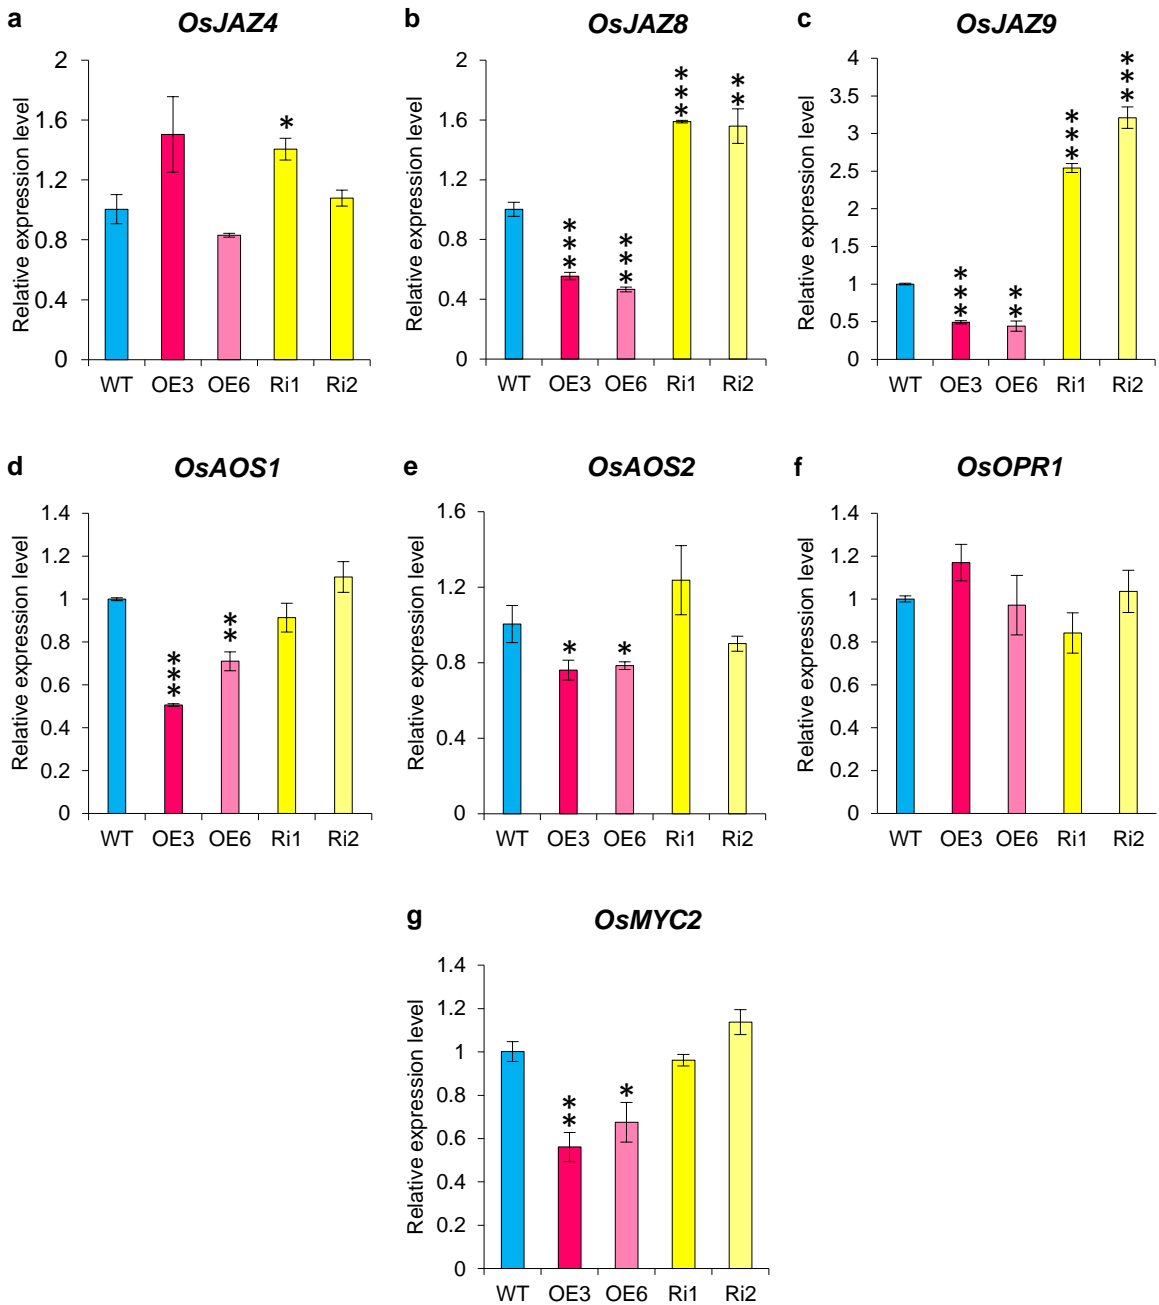

**Supplementary Fig. S6** Overexpression of *OsJAZ11* suppressed expression of JA biosynthesis and signalling genes. **a-g** Relative expression levels of *OsJAZ4*, *OsJAZ8*, *OsJAZ9*, *OsAOS1*, *OsAOS2*, *OsOPR1* and *OsMYC2*. Expression levels were measured by RT-qPCR in roots of thirty-day-old WT and *OsJAZ11* transgenics under Pi deficiency. Each bar displays means of three biological replicates with standard error. Significant differences between WT and transgenics were determined by Student's *t*-test. Asterisks; \*, \*\* and \*\*\* indicate *P* values,  $\leq 0.05$ ,  $0.01$  and  $0.001$ , respectively ( $n=3$ ).

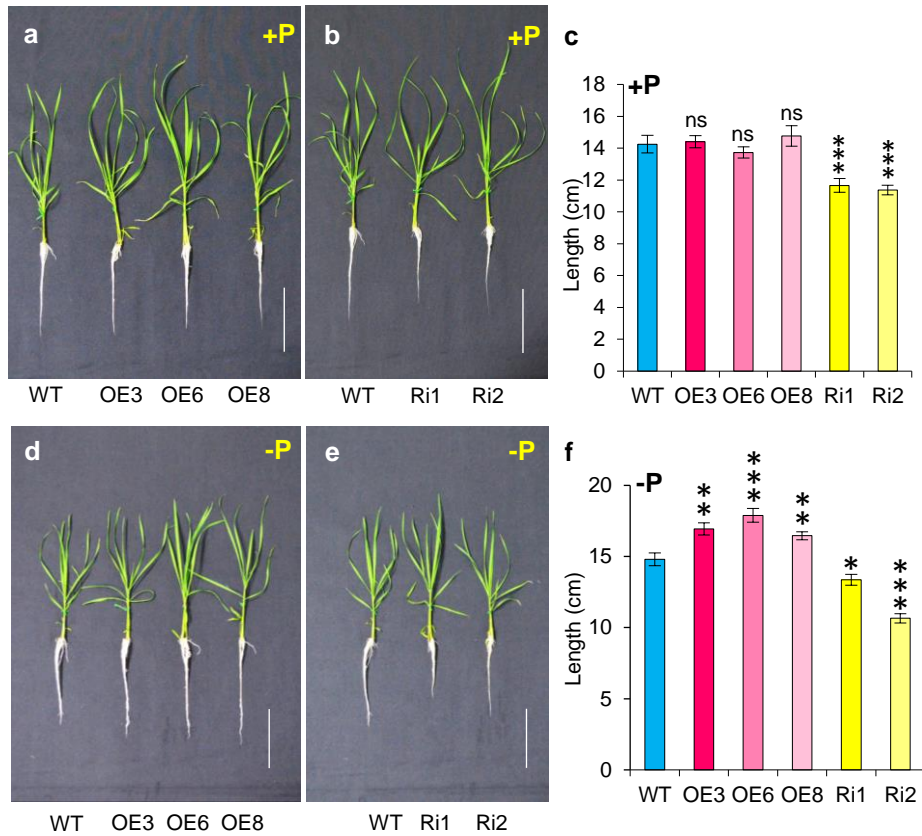

**Supplementary Fig. S7** Root length of fifteen-day-old WT and *OsJAZ11* transgenics. Root phenotype of fifteen-day-old *OsJAZ11* overexpression (OE) lines (**a, d**) and silencing (Ri) lines (**b, e**) compared to WT under +P (**a, b**) and -P (**d, e**) conditions. For imaging three representative plants of each line were stacked together. Scale bar = 10 cm. **c** Quantitation of root lengths of WT, OE and Ri lines under +P conditions. **f** Quantitation of root lengths of WT, OE and Ri lines under -P conditions. Each bar represents mean of ten biological replicates with standard error. Significant differences between WT and transgenics were determined by Student's *t*-test. Asterisks; \*, \*\* and \*\*\* indicate *P* values,  $\leq 0.05$ , 0.01 and 0.001, respectively ( $n=10$ ). Ns denotes no significant differences between WT and transgenics.

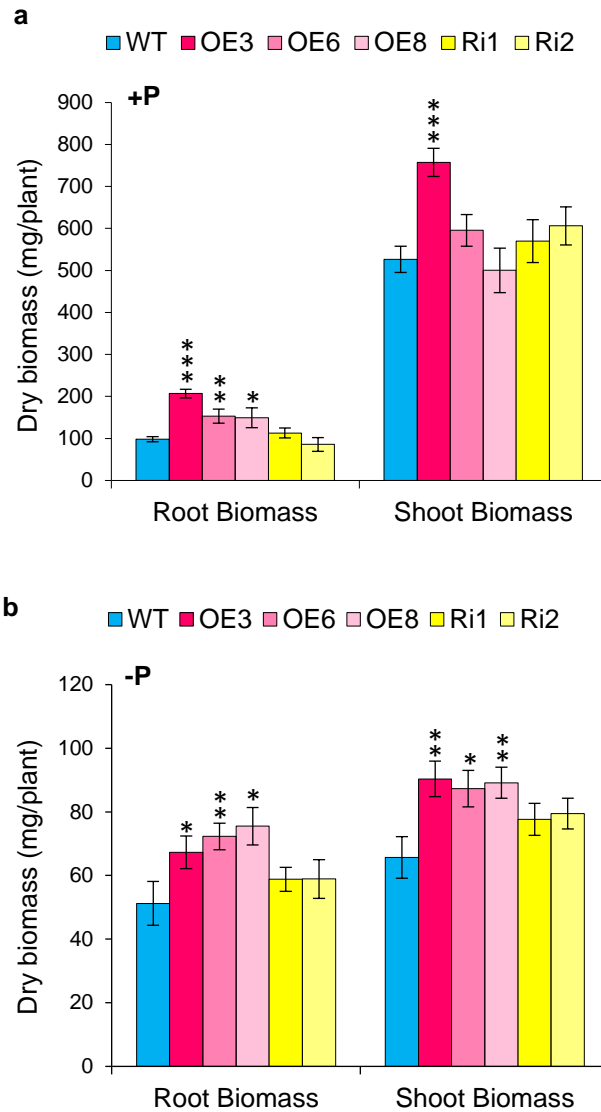

**Supplementary Fig. S8** *OsJAZ11* overexpression lines accumulated higher biomass under Pi deficiency. **a-b** Root and shoot dry biomass of thirty-day-old WT and *OsJAZ11* OE and Ri transgenics under +P and -P conditions. Each bar depicts mean of ten biological replicates with standard error. Significant differences between WT and transgenics were determined by Student's *t*-test. Asterisks; \*, \*\* and \*\*\* indicate *P* values,  $\leq 0.05$ ,  $\leq 0.01$  and  $\leq 0.001$ , respectively ( $n=10$ ).



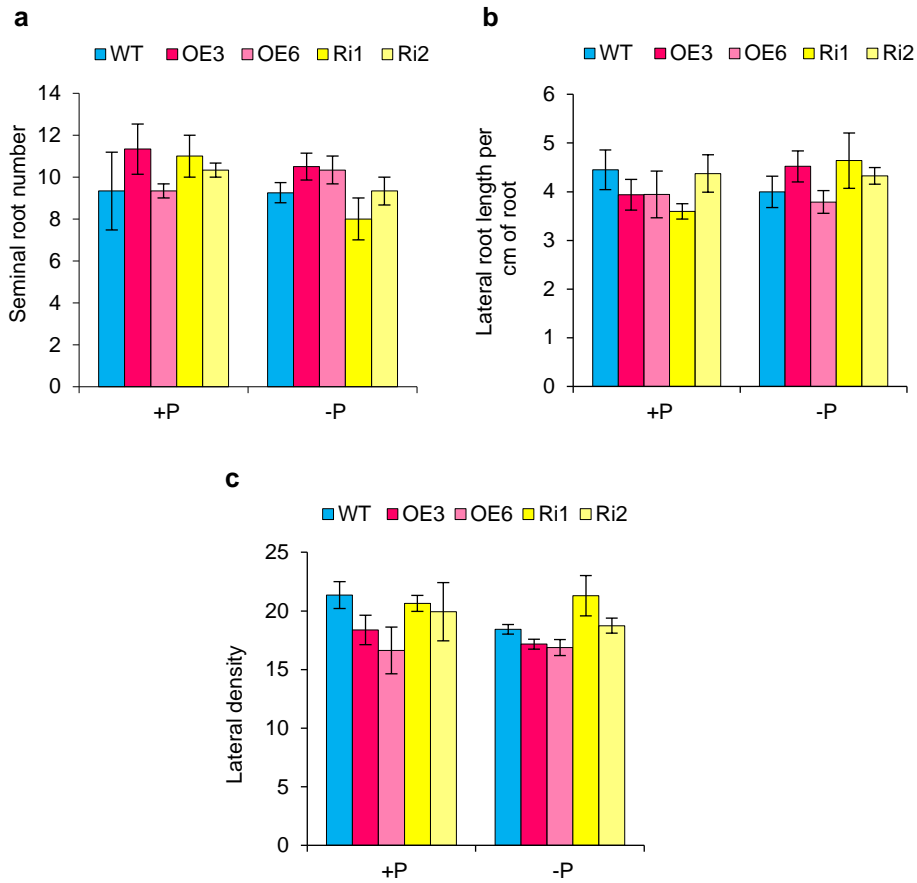

**Supplementary Fig. S9** Effect of *OsJAZ11* on different root traits. Seminal root number (a), lateral root length per cm of root (b) and lateral root density (number of laterals per cm of main root) (c). Root traits were measured in roots of fifteen-day-old WT and *OsJAZ11* transgenics under +P and -P conditions. Each bar represents mean of four replicates with standard error ( $n=4$ ).

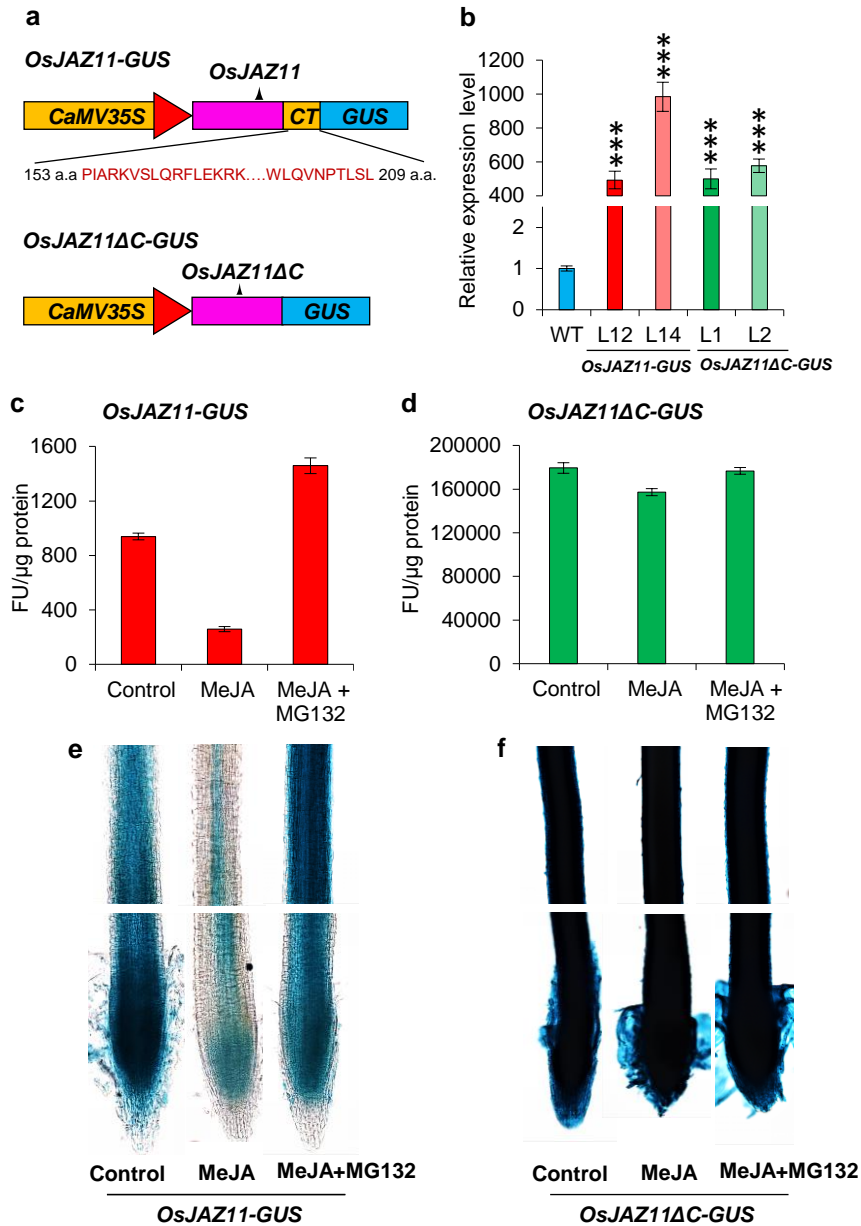

**Supplementary Fig. S10** *OsJAZ11* shows *in vivo* repressor activity. **a** Raising of *OsJAZ11* translational reporters. Schematic representation of *OsJAZ11-GUS* (with Jas motif) and *OsJAZ11ΔC-GUS* (without Jas motif) fusion constructs in pCAMBIA1301. In *OsJAZ11ΔC-GUS*, 57 a.a. (153- 209 a.a.) from C-terminal (CT) end of *OsJAZ11* ORF was deleted. This deleted region also contains Jas motif. **b** Relative expression levels of *OsJAZ11* in WT, *OsJAZ11-GUS* (L12, L14) and *OsJAZ11ΔC-GUS* (L1, L2) transgenics. Expression levels were measured by RT-qPCR in roots of thirty-day-old plants. Each bar represents mean of three biological replicates with standard error. Significant differences between WT and transgenics were determined by Student's *t*-test. Asterisks; \*\*\* indicate *P* value,  $\leq 0.001$  ( $n=3$ ). **c-d** Fluorometric quantitation of GUS signals in roots of fifteen-day-old *OsJAZ11-GUS* (L14) and *OsJAZ11ΔC-GUS* (L1) transgenics subjected to MeJA and/or MG132 treatments. Plants were treated with 100  $\mu$ M MeJA with or without the proteasome inhibitor 100  $\mu$ M MG132 for 1 h. DMSO treated seedlings were used as control. Each bar represents mean of four biological replicates with standard error ( $n=4$ ). **e-f** Representative images showing GUS signals in root tips of fifteen-day-old *OsJAZ11-GUS* (L14) and *OsJAZ11ΔC-GUS* (L1) transgenics treated MeJA and/or MG132 treatments.

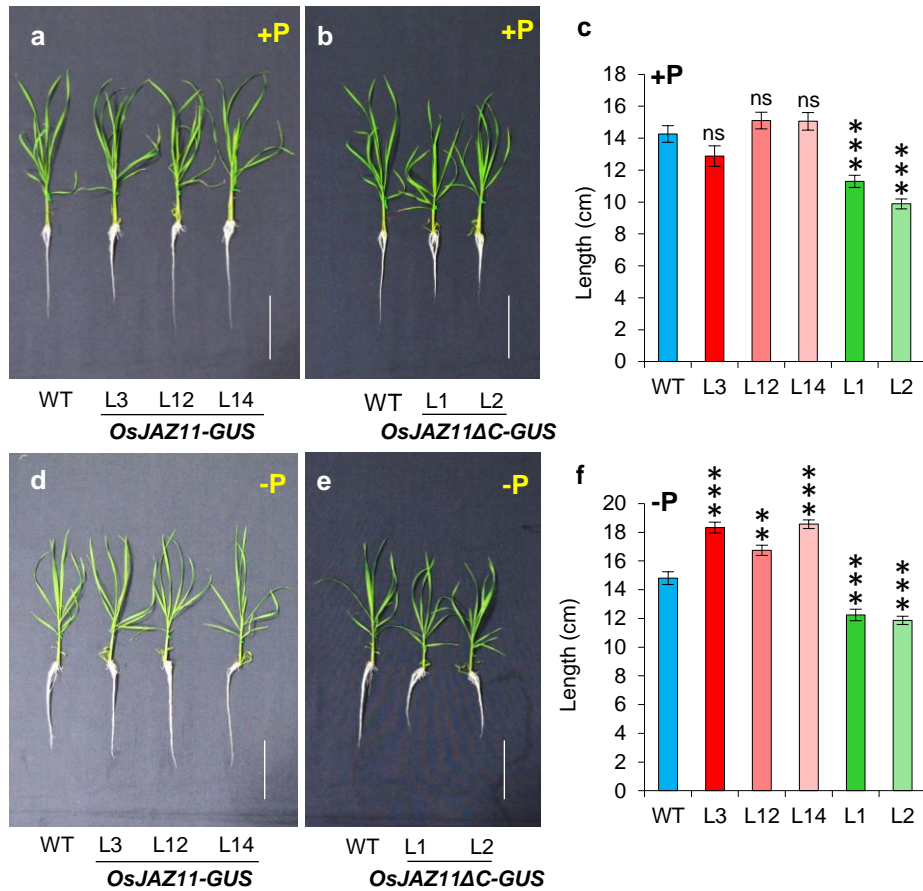

**Supplementary Fig. S11** Root length of fifteen-day-old WT and *OsJAZ11* translational reporters. Root phenotype of fifteen-day-old *OsJAZ11-GUS* (**a**, **d**) and *OsJAZ11ΔC-GUS* lines (**b**, **e**) compared to WT under +P (**a**, **b**) and -P (**d**, **e**) conditions. For imaging three representative plants of each line were stacked together. Scale bar = 10 cm. **c** Quantitation of root lengths of WT and translational reporters under +P conditions. **f** Quantitation of root lengths of WT and translational reporters under -P conditions. Each bar represents mean of ten biological replicates with standard error. Significant differences between WT and transgenics were determined by Student's *t*-test. Asterisks; \*\* and \*\*\* indicate *P* values,  $\leq 0.01$  and  $0.001$ , respectively. Ns denotes no significant differences between WT and transgenics ( $n=10$ ).

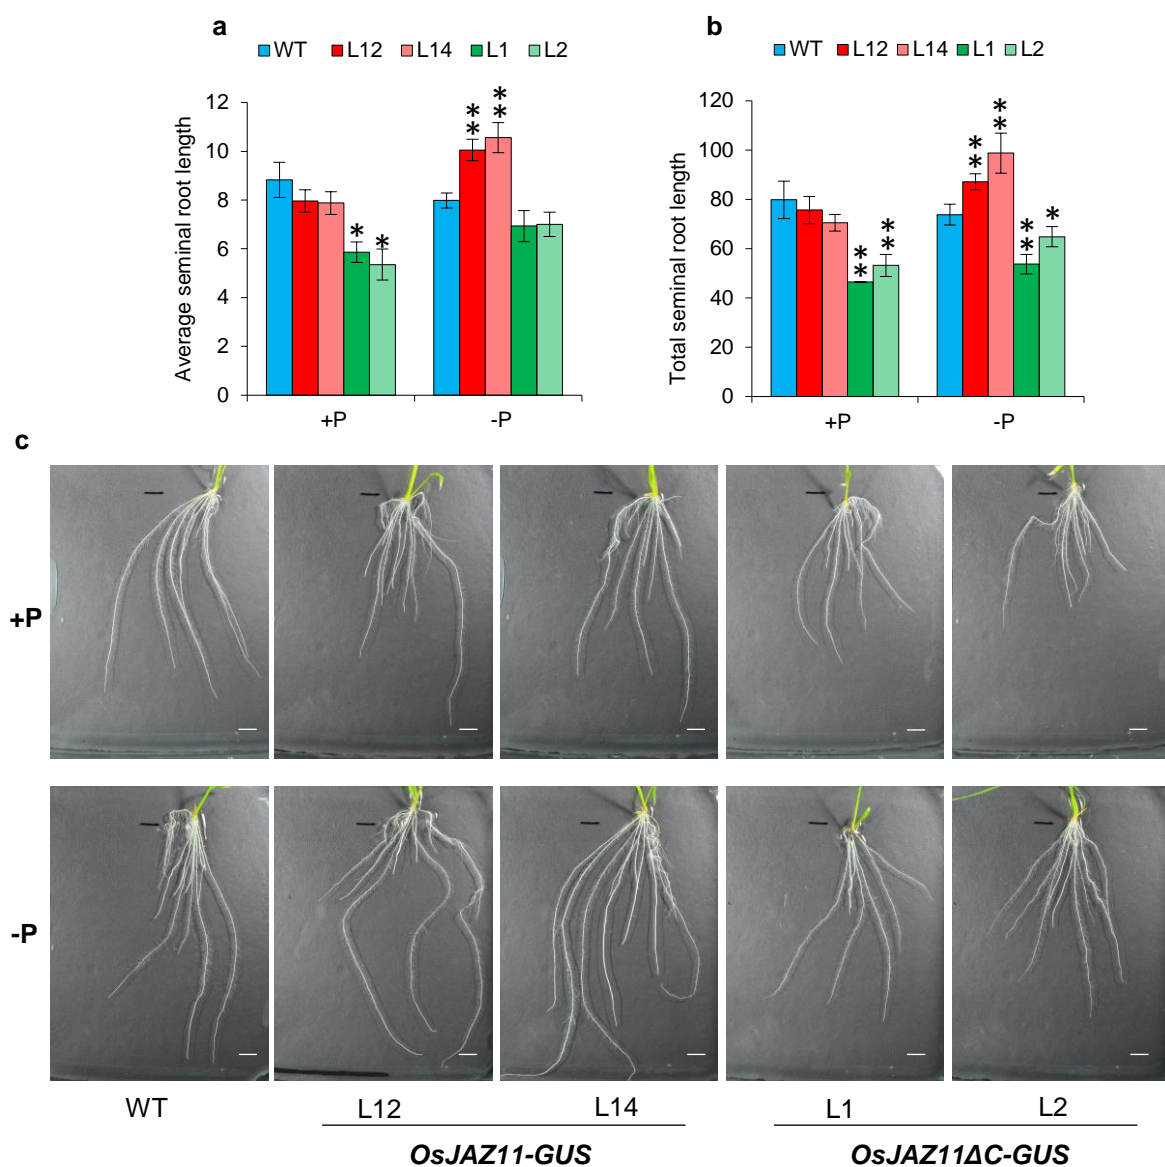

**Supplementary Fig. S12** *OsJAZ11-GUS* lines developed longer seminal roots. Average seminal root length (a) and total seminal root length (b) of fifteen-day-old WT, *OsJAZ11-GUS* (L12, L14) and *OsJAZ11ΔC-GUS* (L1, L2) lines under +P and -P conditions. Each bar represents mean from four replicates with standard error. Significant differences between WT and transgenics were determined by Student's *t*-test. Asterisks; \* and \*\* indicate *P* values,  $\leq 0.05$  and  $0.01$ , respectively ( $n=4$ ). c Representative images of fifteen-day-old WT and *OsJAZ11* translational reporters under +P and -P conditions. White line at bottom of each image denotes scale of 1 cm.

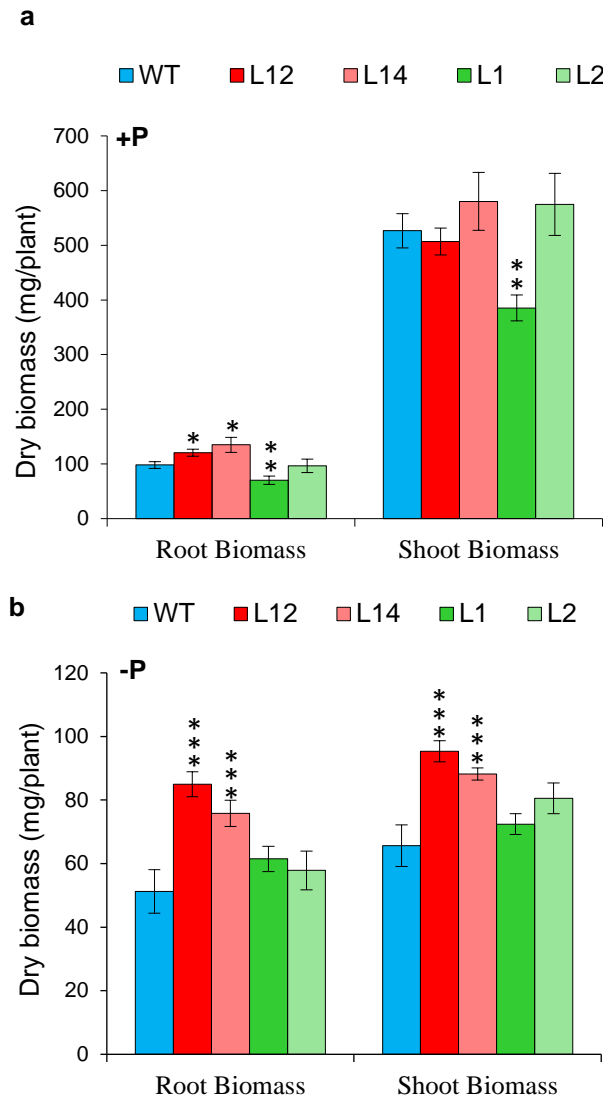

**Supplementary Fig. S13** *OsJAZ11-GUS* lines accumulated more biomass under Pi deficiency. Root and shoot dry biomass of thirty-day-old WT, *OsJAZ11-GUS* (L12, L14) and *OsJAZ11ΔC-GUS* (L1, L2) lines under +P (a) and -P (b) conditions. Each bar represents mean of ten biological replicates with standard error. Significant differences between WT and transgenics were determined by Student's *t*-test. Asterisks; \*, \*\* and \*\*\* indicate *P* values,  $\leq 0.05$ , 0.01 and 0.001, respectively ( $n=10$ ).

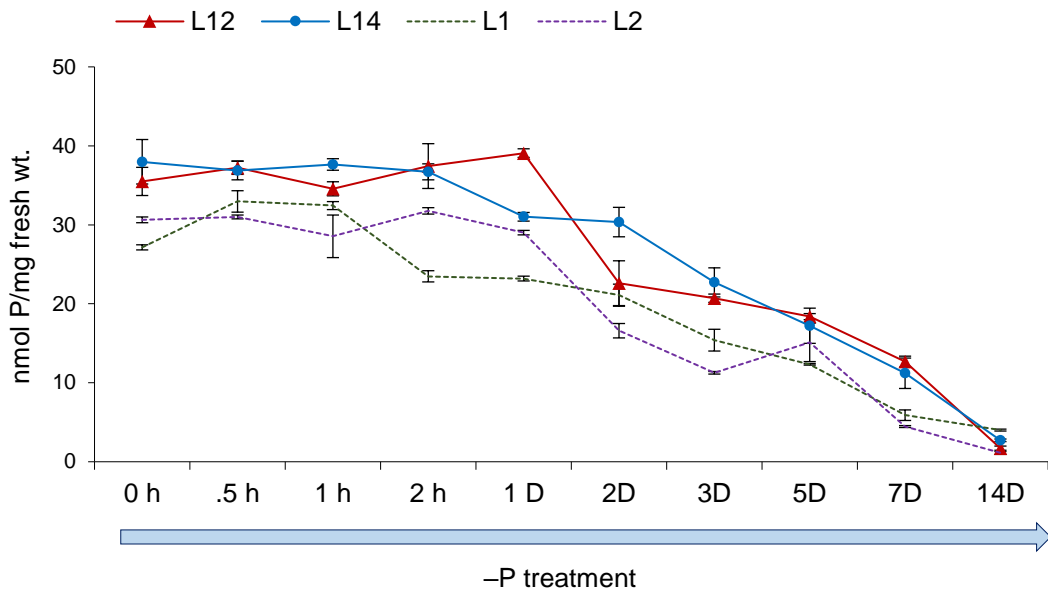

**Supplementary Fig. S14** *OsJAZ11*-GUS transgenics accumulated higher Pi than *OsJAZ11ΔC*-GUS transgenics. Seven-day-old rice seedlings of *OsJAZ11*-GUS (L12, L14) and *OsJAZ11ΔC*-GUS (L1, L2) lines grown under +P conditions were transferred to -P conditions. Soluble Pi was measured at indicated time-points. Means were calculated from three biological replicates. Error bars indicate standard error ( $n=3$ ).

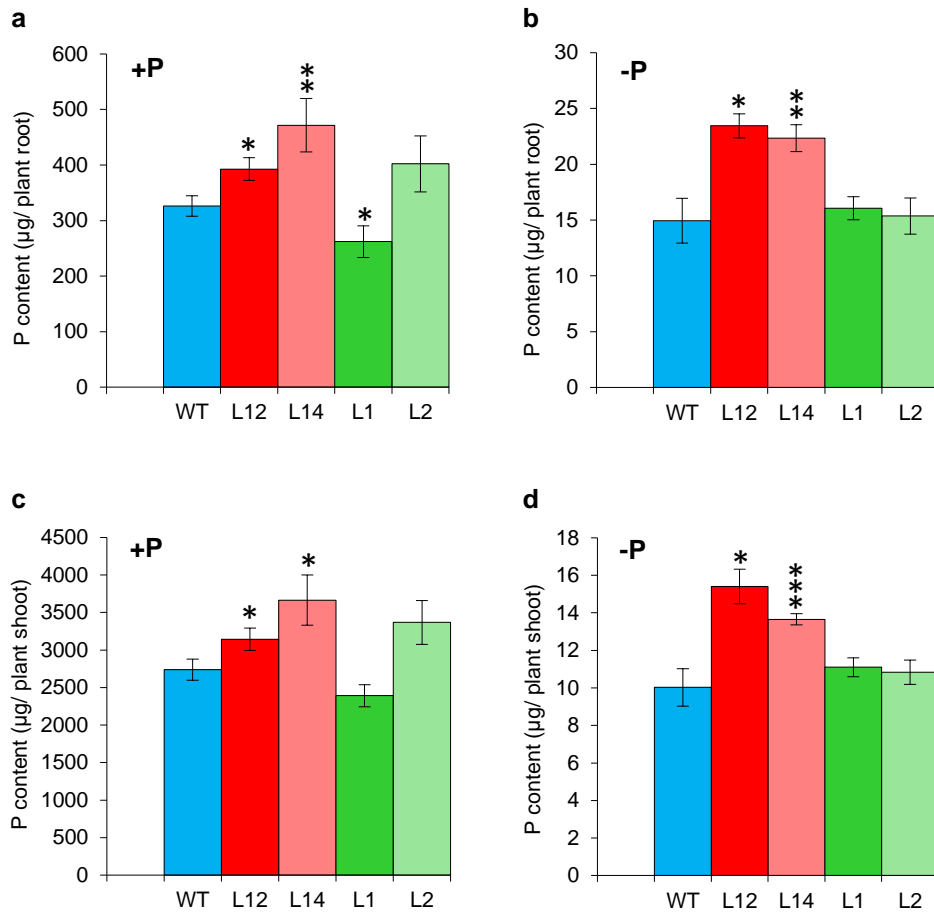

**Supplementary Fig. S15** *OsJAZ11-GUS* lines showed higher phosphorous uptake under Pi deficiency. **a-b** P content of roots of thirty-day-old plants of WT, *OsJAZ11-GUS* (L12, L14) and *OsJAZ11ΔC-GUS* (L1, L2) lines under +P and -P conditions. **c-d** P content of shoots of thirty-day-old plants of WT, *OsJAZ11-GUS* (L12, L14) and *OsJAZ11ΔC-GUS* (L1, L2) lines under +P and -P conditions. Each bar displays means of ten biological replicates with standard error. Significant differences between WT and transgenics were determined by Student's *t*-test. Asterisks; \*, \*\* and \*\*\* indicate *P* values,  $\leq 0.05$ , 0.01 and 0.001, respectively ( $n=10$ ).

**a**

**Control**

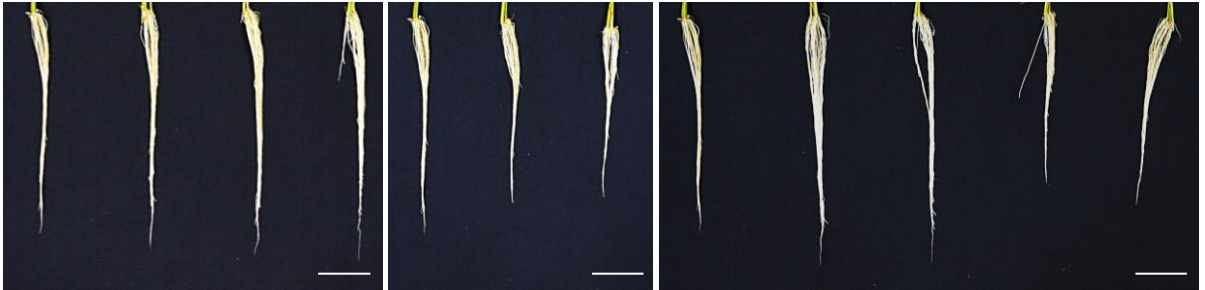

**+ MeJA**

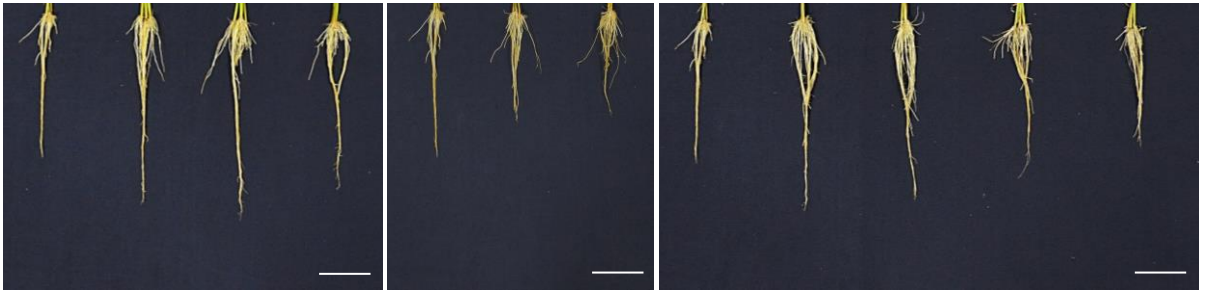

WT    OE3    OE6    OE8    WT    Ri1    Ri2    WT    L12    L14    L1    L2  
*pZmUbi1:OsJAZ11*    *OsJAZ11 RNAi*    *OsJAZ11-GUS OsJAZ11ΔC-GUS*

**b**

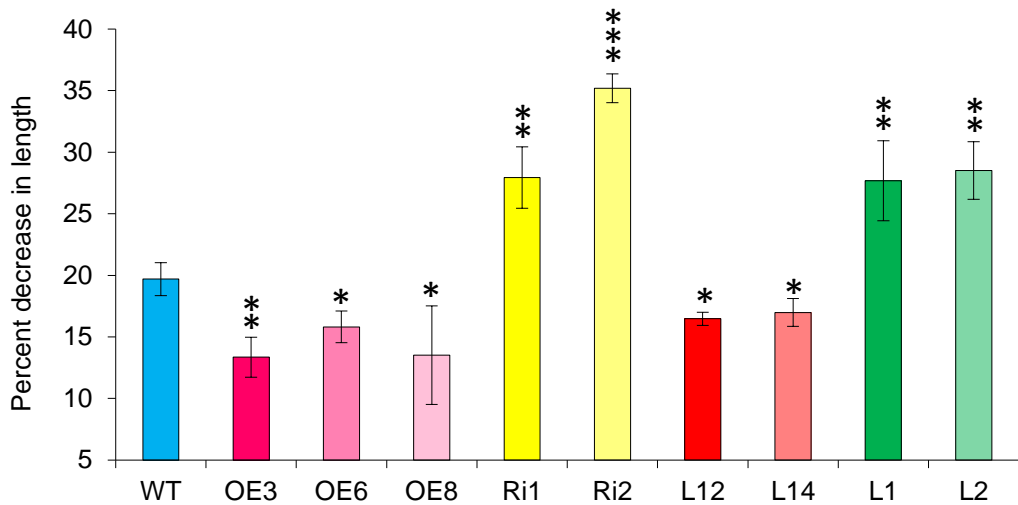

**Supplementary Fig. S16** JA sensitivity assay of *OsJAZ11* transgenics. **a** Root images of WT and *OsJAZ11* transgenics subjected to DMSO (control) and MeJA (10  $\mu$ M) treatment. Seven-day-old rice seedlings were treated with 10  $\mu$ M MeJA or DMSO (control) for 14 days. For imaging three representative plants of each line were stacked together. Scale bar = 5 cm. **b** Percent reduction in root lengths of WT and *OsJAZ11* transgenics after MeJA treatment. Reduction in root length under MeJA treatment was compared to control conditions ( $n=10$ ). Significant differences between WT and transgenics were determined by Student's *t*-test. Asterisks; \*, \*\* and \*\*\* indicate *P* values,  $\leq 0.05$ , 0.01 and 0.001, respectively ( $n=10$ ).



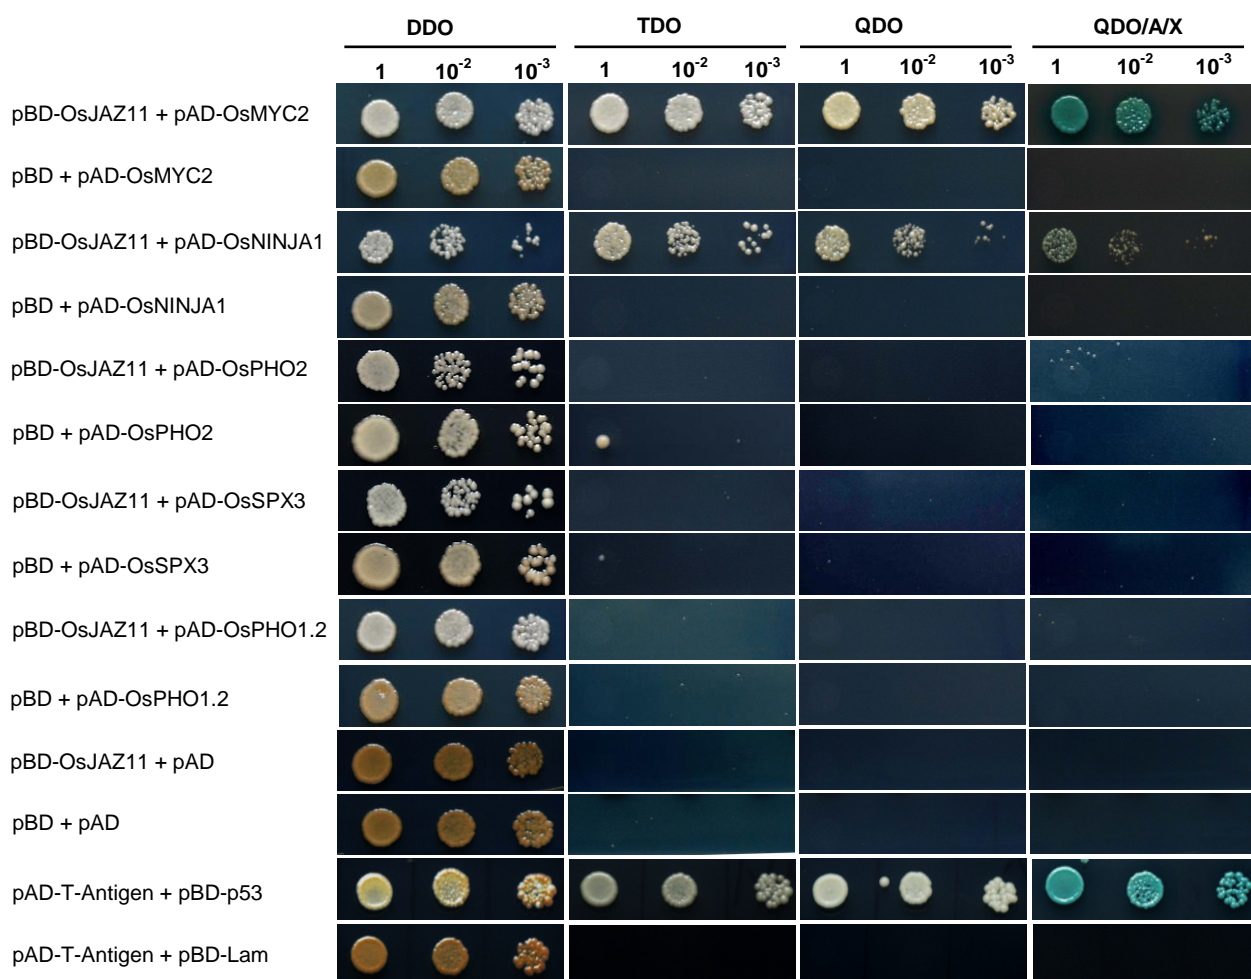

**Supplementary Fig. S17** Interactions assays of OsJAZ11 with JA and Pi signaling proteins. Yeast two-hybrid interaction assays between bait plasmid, pBD-OsJAZ11 and prey plasmids, pAD-OsMYC2, pAD-OsNINJA1, pAD-OsPHO2, pAD-OsSPX3, pAD-OsPHO1.2. Serial dilutions of Y2H Gold strain co-transformed with AD (prey) and BD (bait) clones were spotted on DDO (SD-Leu/-Trp), TDO (SD- Leu/-Trp/-His), QDO (SD- Leu/-Trp/-His/-Ade) and QDO/A/X (QDO + Aureobasidin A + X- $\alpha$ -Gal). pBD and pAD indicates empty BD (pGBKT7) and AD (pGADT7) vectors, respectively. Interaction between pAD-T-Antigen and pBD-p53 was used as positive control whereas interaction between pAD-T-Antigen and pBD-Lam was used as a negative control.

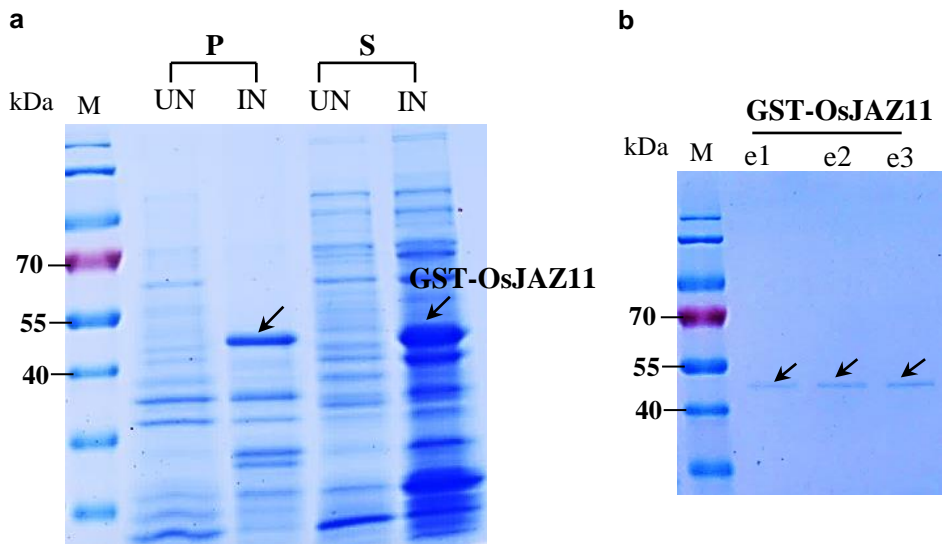

**Supplementary Fig. S18** Induction and purification of OsJAZ11-GST. **a** Overexpression of OsJAZ11-GST in *E. coli* BL21(DE3) induced by IPTG. Induced (IN) and uninduced (UN) total protein fractions were resolved on 12% SDS-PAGE gel. Gel was stained with Coomassie blue. P and S implies proteins in pellet (insoluble) and supernatant (soluble) fractions. 20  $\mu$ g of total protein was loaded in each lane. **b** Coomassie-stained SDS-PAGE gel showing 49.9 kDa purified recombinant OsJAZ11-GST protein.

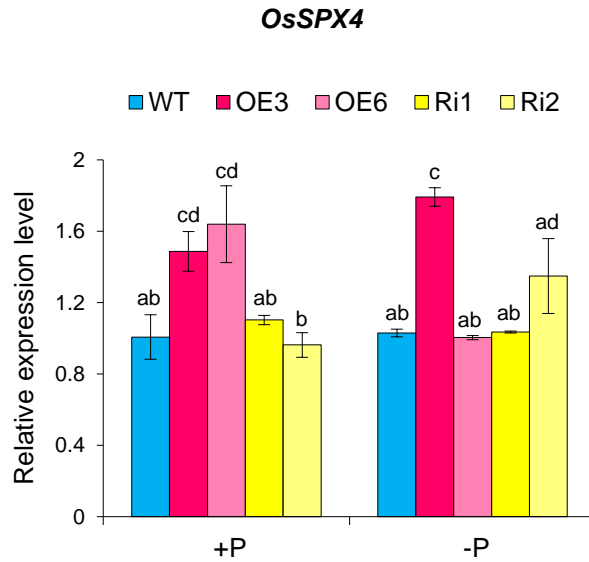

**Supplementary Fig. S19** Expression of *OsSPX4* in WT and *OsJAZ11* transgenics. Relative expression levels of *OsSPX4* in roots of thirty-day-old WT and *OsJAZ11* transgenics under +P and -P conditions. Each bar is the mean of three independent replicates with standard error. Different letters on top of each bar denotes significant differences determined by one-way ANOVA followed by Duncan's multiple comparison test ( $\alpha < 0.05$ ) ( $n=3$ ).

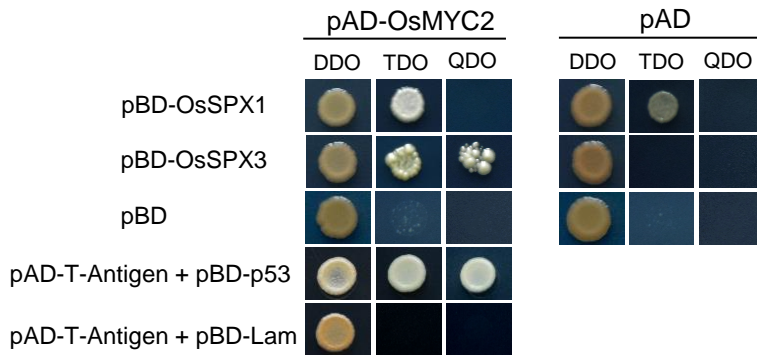

**Supplementary Fig. S20** Interactions assays of OsMYC2 with SPX proteins. Yeast two-hybrid interaction assays between pAD-OsMYC2 and pBD-OsSPX (OsSPX1 and OsSPX3). Cells of yeast strain, Y2H Gold co-transformed with AD (prey) and BD (bait) clones were spotted on DDO (SD-Leu/-Trp), TDO (SD-Leu/-Trp/-His) and QDO (SD- Leu/-Trp/-His/-Ade). pBD and pAD indicates empty BD (pGBKT7) and AD (pGADT7) vectors, respectively. Interaction between pAD-T-Antigen and pBD-p53 was used as positive control whereas interaction between pAD-T-Antigen and pBD-Lam was used as a negative control.

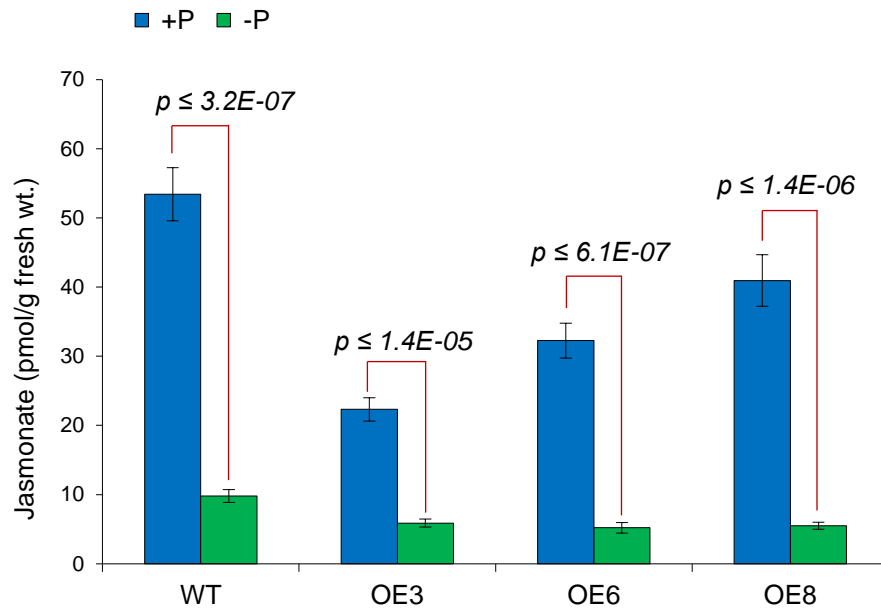

**Supplementary Fig. S21** Pi deficiency reduces JA levels in rice. JA content in roots of thirty-day-old WT and *OsJAZ11* OE transgenics grown under +P and -P conditions. Each bar represents mean of six independent replicates with standard error. Significant differences between WT and transgenics were evaluated by Student's *t*-test ( $n=6$ ).

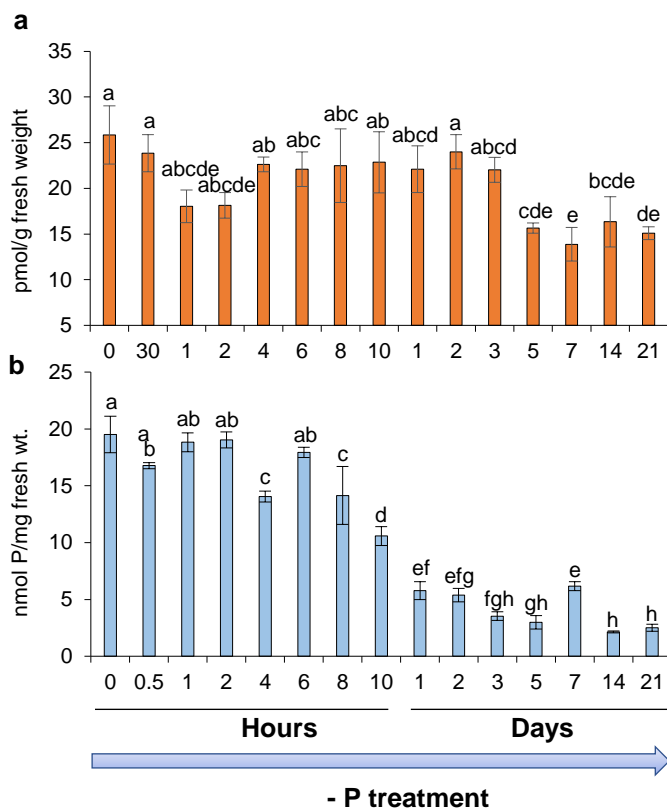

**Supplementary Fig. S22** JA levels in rice under progressive Pi deficiency. JA levels (a) and soluble Pi content (b) in roots of PB1 seedlings. Seven-day-old rice seedlings grown under +P conditions were transferred to -P conditions. Soluble Pi and JA levels were measured at indicated time-points. For JA and Pi measurements means were calculated from six ( $n=6$ ) and four ( $n=4$ ) biological replicates, respectively. Error bars indicate standard error. Different letters on top of each bar denotes significant differences determined by one-way ANOVA followed by Duncan's multiple comparison test ( $\alpha < 0.05$ ).

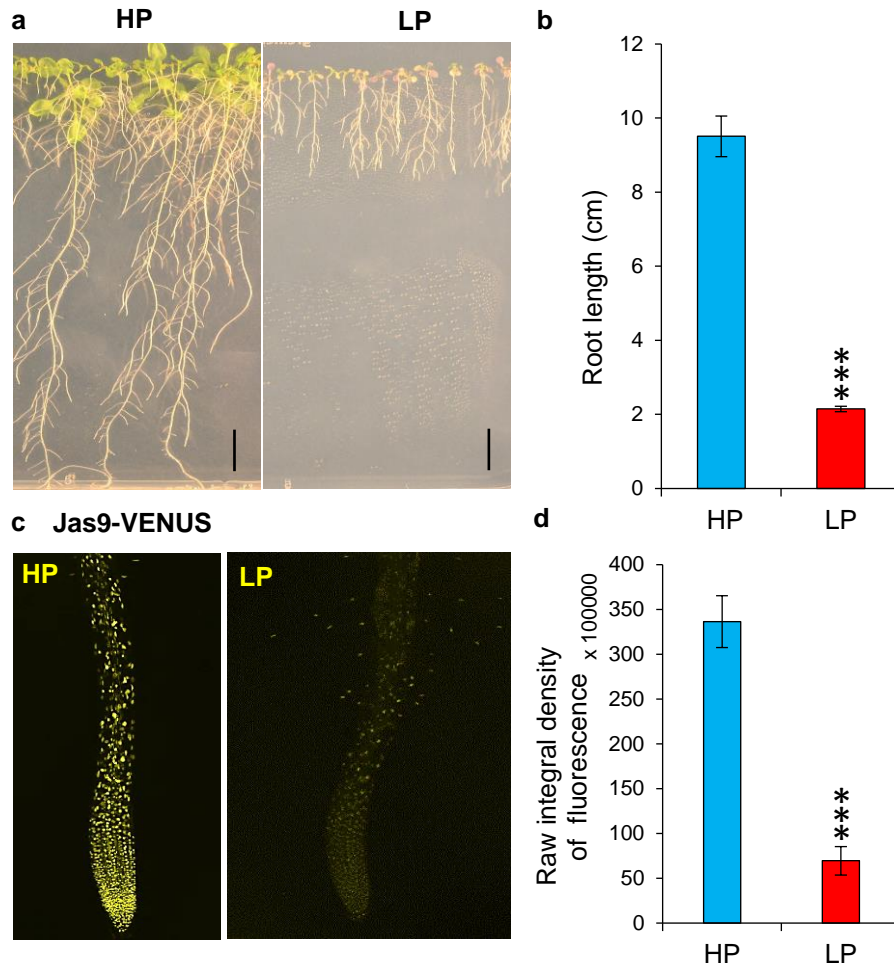

**Supplementary Fig. S23** Pi deficiency leads to root length inhibition and increased JA levels in *Arabidopsis*. **a** Plant phenotype of ten-day-old *Arabidopsis* seedlings (Col-0) grown under Pi sufficient (HP) and deficient (LP) conditions. Scale bar = 1 cm. **b** Quantitation of primary root length of *Arabidopsis* seedling grown under Pi sufficient (HP) and deficient (LP) conditions. Each bar represents mean of ten replicates with standard error. **c** Representative SP5 confocal images showing Jas9-VENUS fluorescence in primary root tips of *Arabidopsis* under HP and LP conditions. **d** Quantitation of VENUS fluorescence under HP and LP conditions. Significant differences between HP and LP conditions were determined by Student's *t*-test. Asterisks; \*\*\* indicate *P* value  $\leq 0.001$  ( $n=10$ ).

**Table S1.** List of primers used in the study

|                                         | <b>F (5'-3')</b>                         | <b>R (5'-3')</b>                      |
|-----------------------------------------|------------------------------------------|---------------------------------------|
| <i>OsJAZ11_pANIC6B</i>                  | CACCGAAGGTTTCGTCCTCGTT                   | CCATAGGTCCGACAGGCATCAA                |
| <i>OsJAZ11_pANIC8B</i>                  | CACCAAGAAAGACGATGGC                      | TATAAGATCAGCATGCATGAAG                |
| <i>OsJAZ11_pMDC163</i>                  | CACCATCAATGCACCTAGGTGC                   | GTTGTAGCTCTAGCAAAATCAGCTAG            |
| <i>OsJAZ11_pCAMBIA1301</i>              | TGCTTAAGATCTAATGGCCGTA<br>GTAGCGA        | TGCTTAAGATCTACCAGGCTG<br>AGAGTGGGGT   |
| <i>OsJAZ11ΔC_pCAMBIA1301</i>            | TGCTTAAGATCTAATGGCCGTA<br>GTAGCGA        | TGCTTAAGATCTACCATGTCT<br>GGTAGGCAAGGC |
| <i>OsJAZ11_pGEX4T1</i>                  | TGCTTAGGATCCATGGCCGGTAG<br>TAGCGAGC      | GAGTTCGAATTCTCACAGGCT<br>GAGAGTGGGGT  |
| <i>OsSPX1_pET28a</i>                    | AATTGGATCCATGAAGTTTGGGA<br>AGAGCCTGAGTAG | GATCGAATTCTCATTTGGCGG<br>CCTGCTC      |
| <i>OsJAZ11_qRT_pCAMBIA</i>              | ACGCTGAAAGACACGCAAGA                     | TGGTCAGCTGCGCCTTCT                    |
| <i>OsJAZ11_qRT_pANIC6B/<br/>pANIC8B</i> | AATTCTTTCATGCATGCTGATCT<br>TA            | AGGTCCGACAGGCATCAATC                  |
| <i>OsSPX1_qRT</i>                       | TATATGAAGGGCACGGTCGC                     | ACAGTAGAGCTCCGCTTCG                   |
| <i>OsSPX2_qRT</i>                       | CACCACCGACCTCCTCTACAA                    | GTTCGTTTCGTCCGCATGAG                  |
| <i>OsSPX3_qRT</i>                       | GACGTACGGGCGGTTCTCG                      | GGATCGGATCGGATGGACTG                  |
| <i>OsSPX4_qRT</i>                       | GCCAGCCACGTGATGAATG                      | AGGGCCTCGGAGGATTAAC                   |
| <i>OsSPX5_qRT</i>                       | ATGCCACATATTGCGACGAG                     | TCGATTTCAATTTGCTGCCAA<br>AAG          |
| <i>OsPT1_qRT</i>                        | CCTCGACATCGCCTTCTACAG                    | CACCCGACCTTGCTGAAGAT                  |
| <i>OsPT4_qRT</i>                        | TCGGCGTGCGCAACT                          | GGCACCAGGAACGTGAAGAA                  |
| <i>OsPT8_qRT</i>                        | GTCCCGGGCTACTGGTTCA                      | TGAAAAACCCTAGCAGCTGG<br>AT            |
| <i>OsPT9_qRT</i>                        | CCGGCTACATCGTGCTCTACT                    | AGGATGAAGGTGGTGGTGTT<br>G             |
| <i>OsIPS1_qRT</i>                       | AAGGGCAGGGCACACTCCACAT<br>TATC           | ATTAGAGCAAGGACCGAAAC<br>ACAAAC        |
| <i>OsGDPD5_qRT</i>                      | TCCCCAACCGATCTTGTC                       | GAAAGTGTATGGATGCACCT<br>GAAG          |
| <i>OsMGDG3_qRT</i>                      | AGTCGGGAATGTGCCTTACG                     | CTCGGGTCCTTGGAGAACAC                  |
| <i>OsPAP3b_qRT</i>                      | GCTCGATTGCGCTTCTACGA                     | TTTGCTGAAGCTCCAGTGGT                  |
| <i>OsPAP10a_qRT</i>                     | CGCCATCCTGGACATCAAG                      | TTGCGGTGCCACGTGTAG                    |
| <i>OsJAZ4_qRT</i>                       | GAGTGCCAATGACAACAAGTCA<br>TC             | TGATTCGTCGCGGTTGCT                    |
| <i>OsJAZ8_qRT</i>                       | GAAGGCTCAACAGCTGACCAT                    | TTGGTGGACGGGAAGTTCTC                  |
| <i>OsJAZ9_qRT</i>                       | CGGTCGAGTTGGAAGATGGTT                    | GGTCAGGCTCGGCGAAAT                    |
| <i>OSAOS1_qRT</i>                       | CGCCTCGGCATTGCA                          | AGCGTCGGGAACAGGATCTT                  |
| <i>OsAOS2_qRT</i>                       | TGCCATGATCATCGAGGAT                      | ACGCGTACAGCGCCTTGTA                   |
| <i>OsOPR1_qRT</i>                       | TCGCTGCTGGCGGGTAT                        | TAGCCATCAGCCACCACCTT                  |
| <i>OsMYC2_qRT</i>                       | AAATCCATTCCACCCCATACC                    | CCGTCCAAAGGTTTCATCGAT                 |
| <i>OsUBQ5_qRT</i>                       | ACCACTTCGACCGCCACTACT                    | ACGCCTAAGCCTGCTGGTT                   |
| <i>OsJAZ11_P1BS EMSA</i>                | GAGTCACATCGGATATACATAC<br>ACATATTT       | AAATATGTGTATGTATATCCG<br>ATGTGACTC    |
| <i>OsJAZ11_mP1BS EMSA</i>               | GAGTCACATCTGCGCGAAATAC<br>ACATATTT       | AAATATGTGTATTTTCGCGCAG<br>ATGTGACTC   |
| <i>OsSPX2_P1BS EMSA</i>                 | TATCCCGTACGAATATTCCTC<br>TTCTCC          | GGAGGAAGAGGAATATTCGT<br>GACGGGGATA    |
| <i>OsJAZ11_BD</i>                       | CACCATGGCCGGTAGTAGC                      | CAGGCTGAGAGTGGGGTTC                   |



|                       |                                          |                                      |
|-----------------------|------------------------------------------|--------------------------------------|
| <i>OsSPX1_AD/BD</i>   | CACCATGAAGTTTGGGAAGAGC<br>CTG            | TTTGGCGGCCTGCTCAATCAC                |
| <i>OsSPX3_AD/BD</i>   | CACCATGAAGTTTGGGAAGAG                    | GGCATAAAAAAACTGTAAAC<br>TTGGA        |
| <i>OsMYC2_AD</i>      | CACCATGTGGGTTTTGTTATCTC<br>CTCTCCTCACCAC | CCGGGCGGCAGGTGCCAG                   |
| <i>OsPHO1;2_AD/BD</i> | CACCATGGTGAAGTTCTCGAGG                   | ATCAGTTTCAAGTTCACGGA<br>ATGGTAAT     |
| <i>OsPHO2_AD</i>      | CACCATGGATCTATATGCAATTG<br>ACTCGGACACT   | CGGGCTGCAGGGGATGCC                   |
| <i>OsNINJA1_AD</i>    | AGAATTCCATATGGACGATGAG<br>AATGGCCT       | TGCTTAGAATTCTTAGTTTTG<br>GGCTGAGGCTG |

**Table S2.** List of interacting proteins identified in *OsJAZ11* OE lines using MS using Exactive™ Plus Orbitrap Mass Spectrometer

| Accession | Description                                                                                                               | Sum PEP Score | Coverage [%] | No. of Peptides | No. of AAs | MW [kDa] | pI   | Biological Process                                                        | Molecular Function                                        | Gene Symbol                               | KEGG Pathways                                                                                                                                                                        |
|-----------|---------------------------------------------------------------------------------------------------------------------------|---------------|--------------|-----------------|------------|----------|------|---------------------------------------------------------------------------|-----------------------------------------------------------|-------------------------------------------|--------------------------------------------------------------------------------------------------------------------------------------------------------------------------------------|
| Q8GRS2    | Protein TIFY 11c OS= <i>Oryza sativa</i> subsp. japonica OX=39947 GN=TIFY11C PE=1 SV=1                                    | 15.393        | 31           | 5               | 209        | 22       | 5.74 | metabolic process; regulation of biological process; response to stimulus | protein binding                                           | Os03g0180900; LOC4331833                  | Plant hormone signal transduction                                                                                                                                                    |
| Q0J8A4    | Glyceraldehyde-3-phosphate dehydrogenase 1, cytosolic OS= <i>Oryza sativa</i> subsp. japonica OX=39947 GN=GAPC1 PE=1 SV=1 | 15.044        | 27           | 7               | 337        | 36.4     | 7.11 | metabolic process                                                         | catalytic activity; nucleotide binding                    | Os08g0126300; LOC4344564                  | Biosynthesis of secondary metabolites; Metabolic pathways; Biosynthesis of amino acids; Carbon fixation in photosynthetic organisms; Glycolysis / Gluconeogenesis; Carbon metabolism |
| Q7FAH2    | Glyceraldehyde-3-phosphate dehydrogenase 2, cytosolic OS= <i>Oryza sativa</i> subsp. japonica OX=39947 GN=GAPC2 PE=1 SV=1 | 10.571        | 17           | 5               | 337        | 36.8     | 6.81 | metabolic process                                                         | catalytic activity; nucleotide binding                    | Os04g0486600; LOC4336216                  | Biosynthesis of secondary metabolites; Metabolic pathways; Biosynthesis of amino acids; Carbon fixation in photosynthetic organisms; Glycolysis / Gluconeogenesis; Carbon metabolism |
| Q2R8Z5    | Alcohol dehydrogenase 1 OS= <i>Oryza sativa</i> subsp. japonica OX=39947 GN=ADH1 PE=2 SV=2                                | 6.257         | 6            | 1               | 379        | 41       | 6.65 | metabolic process                                                         | catalytic activity; metal ion binding                     | Os11g0210300; LOC4350053                  | Biosynthesis of secondary metabolites; Fatty acid degradation; Metabolic pathways; Glycolysis / Gluconeogenesis; Tyrosine metabolism; alpha-Linolenic acid metabolism                |
| P93438    | S-adenosylmethionine synthase 2 OS= <i>Oryza sativa</i> subsp. japonica OX=39947 GN=SAM2 PE=2 SV=1                        | 5.578         | 15           | 3               | 394        | 42.9     | 6.05 | metabolic process                                                         | catalytic activity; metal ion binding; nucleotide binding | OSJNBa0011P19.5; Os01g0323600; LOC4326996 | Cysteine and methionine metabolism; Biosynthesis of secondary metabolites; Metabolic pathways; Biosynthesis of amino acids                                                           |
| Q2QS14    | UDP-glucose 6-dehydrogenase 4 OS= <i>Oryza sativa</i> subsp. japonica OX=39947 GN=UGD4 PE=2 SV=1                          | 4.755         | 9            | 3               | 480        | 52.8     | 6.13 | metabolic process                                                         | catalytic activity; nucleotide binding                    | Os12g0443500; LOC4352146                  | Pentose and glucuronate interconversions; Metabolic pathways; Ascorbate and aldarate metabolism; Amino sugar and nucleotide sugar metabolism                                         |
| Q9XGP7    | Tricin synthase 1 OS= <i>Oryza sativa</i> subsp. japonica OX=39947 GN=ROMT-15 PE=1 SV=1                                   | 3.858         | 17           | 2               | 252        | 27.8     | 5.31 | metabolic process                                                         | catalytic activity; metal ion binding                     | Os08g0498100; LOC4345934                  |                                                                                                                                                                                      |
| Q2QS13    | UDP-glucose 6-dehydrogenase 5 OS= <i>Oryza sativa</i> subsp. japonica OX=39947 GN=UGD5 PE=2 SV=1                          | 3.607         | 9            | 3               | 480        | 52.9     | 6.13 | metabolic process                                                         | catalytic activity; nucleotide binding                    | Os12g0443600; LOC4352147                  | Pentose and glucuronate interconversions; Metabolic pathways; Ascorbate and                                                                                                          |

|        |                                                                                                                                            |       |    |   |      |       |      |                                                                                      |                                                                                                           |                                         |                                                                                                                                                       |
|--------|--------------------------------------------------------------------------------------------------------------------------------------------|-------|----|---|------|-------|------|--------------------------------------------------------------------------------------|-----------------------------------------------------------------------------------------------------------|-----------------------------------------|-------------------------------------------------------------------------------------------------------------------------------------------------------|
|        |                                                                                                                                            |       |    |   |      |       |      |                                                                                      |                                                                                                           |                                         | aldarate metabolism; Amino sugar and nucleotide sugar metabolism                                                                                      |
| P31924 | Sucrose synthase 1 OS=Oryza sativa subsp. japonica OX=39947 GN=SUS1 PE=1 SV=1                                                              | 3.247 | 2  | 1 | 816  | 92.8  | 6.38 | metabolic process; response to stimulus                                              | catalytic activity                                                                                        | Os03g0401300; LOC4333062                | Starch and sucrose metabolism; Metabolic pathways                                                                                                     |
| Q9FR35 | Peroxiredoxin-2C OS=Oryza sativa subsp. japonica OX=39947 GN=PRXIIC PE=1 SV=1                                                              | 3.075 | 14 | 1 | 162  | 17.3  | 5.88 | cellular homeostasis; metabolic process; regulation of biological process            | antioxidant activity; catalytic activity                                                                  | Os01g0675100; LOC4325511                |                                                                                                                                                       |
| Q0J7U6 | Protein TOPLESS-RELATED PROTEIN 2 OS=Oryza sativa subsp. japonica OX=39947 GN=TPR2 PE=1 SV=1                                               | 2.898 | 3  | 3 | 1133 | 124.7 | 7.28 | metabolic process; regulation of biological process                                  | protein binding                                                                                           | Os08g0162100; LOC4344728                |                                                                                                                                                       |
| P51823 | ADP-ribosylation factor 2 OS=Oryza sativa subsp. japonica OX=39947 GN=ARF PE=2 SV=2                                                        | 2.698 | 25 | 3 | 181  | 20.7  | 6.95 | metabolic process; regulation of biological process; response to stimulus; transport | catalytic activity; nucleotide binding; protein binding; signal transducer activity; transporter activity | Os05g0489600; LOC4339157                | Endocytosis                                                                                                                                           |
| A3C6D7 | Actin-2 OS=Oryza sativa subsp. japonica OX=39947 GN=ACT2 PE=2 SV=1                                                                         | 2.319 | 8  | 2 | 377  | 41.7  | 5.49 |                                                                                      | nucleotide binding                                                                                        | Os10g0510000; LOC4349087                |                                                                                                                                                       |
| P45960 | Tubulin beta-4 chain OS=Oryza sativa subsp. japonica OX=39947 GN=TUBB4 PE=2 SV=1                                                           | 1.976 | 5  | 2 | 447  | 50.3  | 4.86 | cell organization and biogenesis; cellular component movement                        | catalytic activity; nucleotide binding; structural molecule activity                                      | Os01g0805900; LOC4327550                |                                                                                                                                                       |
| Q53M52 | Tubulin alpha-2 chain OS=Oryza sativa subsp. japonica OX=39947 GN=TUBA PE=2 SV=1                                                           | 1.432 | 4  | 1 | 451  | 49.7  | 4.96 | cell organization and biogenesis                                                     | catalytic activity; nucleotide binding; structural molecule activity                                      | Os11g0247300; LOC4350197                | Phagosome                                                                                                                                             |
| Q2QLY4 | 5-methyltetrahydropteroyltriglutamate--homocysteine methyltransferase 2 OS=Oryza sativa subsp. japonica OX=39947 GN=Os12g0624000 PE=2 SV=1 | 1.141 | 2  | 1 | 766  | 84.6  | 6.3  | metabolic process                                                                    | catalytic activity; metal ion binding                                                                     | Os12g0624000; LOC4352833                | Selenocompound metabolism; Cysteine and methionine metabolism; Biosynthesis of secondary metabolites; Metabolic pathways; Biosynthesis of amino acids |
| Q0J4P2 | Heat shock protein 81-1 OS=Oryza sativa subsp. japonica OX=39947 GN=HSP81-1 PE=3 SV=2                                                      | 1.019 | 4  | 1 | 699  | 80.1  | 5.07 | metabolic process; response to stimulus                                              | nucleotide binding; protein binding                                                                       | OJ1118_A06.20; Os08g0500700; LOC4345951 | Plant-pathogen interaction; Protein processing in endoplasmic reticulum                                                                               |
| P93431 | Ribulose biphosphate carboxylase/oxygenase activase, chloroplastic OS=Oryza sativa subsp. japonica OX=39947 GN=RCA PE=1 SV=2               | 0.969 | 4  | 1 | 466  | 51.4  | 5.62 | regulation of biological process                                                     | enzyme regulator activity; nucleotide binding                                                             | Os11g0707000; LOC4351224                |                                                                                                                                                       |

|        |                                                                                                      |       |    |   |      |       |      |                                                                                                             |                                                                                                      |                                                                                                        |                                                                                                                                                                                   |
|--------|------------------------------------------------------------------------------------------------------|-------|----|---|------|-------|------|-------------------------------------------------------------------------------------------------------------|------------------------------------------------------------------------------------------------------|--------------------------------------------------------------------------------------------------------|-----------------------------------------------------------------------------------------------------------------------------------------------------------------------------------|
| O64937 | Elongation factor 1-alpha OS=Oryza sativa subsp. japonica OX=39947 GN=REFA1 PE=2 SV=2                | 0.823 | 2  | 1 | 447  | 49.3  | 9.06 | metabolic process                                                                                           | catalytic activity; nucleotide binding; RNA binding                                                  | Os03g0177900; LOC4331812; Os03g0178000; LOC4331813; Os03g0177400; LOC4331810; Os03g0177500; LOC4331811 | RNA transport                                                                                                                                                                     |
| P14655 | Glutamine synthetase, chloroplastic OS=Oryza sativa subsp. japonica OX=39947 GN=GLN2 PE=1 SV=1       | 0.799 | 4  | 1 | 428  | 46.6  | 6.34 | metabolic process; response to stimulus                                                                     | catalytic activity; nucleotide binding                                                               | Os04g0659100; LOC4337272                                                                               | Arginine biosynthesis; Nitrogen metabolism; Metabolic pathways; Biosynthesis of amino acids; Alanine, aspartate and glutamate metabolism; Glyoxylate and dicarboxylate metabolism |
| Q10L71 | Villin-2 OS=Oryza sativa subsp. japonica OX=39947 GN=VLN2 PE=2 SV=1                                  | 0.699 | 2  | 1 | 966  | 106.1 | 5.82 | cell organization and biogenesis; regulation of biological process; response to stimulus                    | protein binding                                                                                      | Os03g0356700; LOC4332869                                                                               |                                                                                                                                                                                   |
| P42211 | Aspartic proteinase OS=Oryza sativa subsp. japonica OX=39947 GN=RAP PE=2 SV=2                        | 0.631 | 5  | 1 | 496  | 54.1  | 6.15 | metabolic process                                                                                           | catalytic activity                                                                                   | Os05g0137400; LOC4337744                                                                               |                                                                                                                                                                                   |
| P51431 | Ubiquitin-40S ribosomal protein S27a-2 OS=Oryza sativa subsp. japonica OX=39947 GN=RPS27AB PE=2 SV=3 | 0.612 | 10 | 1 | 155  | 17.7  | 9.8  | metabolic process                                                                                           | metal ion binding; protein binding; structural molecule activity                                     | Os05g0160200; LOC4337883                                                                               | Ribosome                                                                                                                                                                          |
| Q01859 | ATP synthase subunit beta, mitochondrial OS=Oryza sativa subsp. japonica OX=39947 GN=ATPB PE=1 SV=2  | 0.585 | 7  | 1 | 552  | 58.9  | 6.37 | metabolic process; transport                                                                                | catalytic activity; nucleotide binding; transporter activity                                         | Os05g0553000; LOC4339546                                                                               | Oxidative phosphorylation; Metabolic pathways                                                                                                                                     |
| Q9MAX5 | Coatomer subunit zeta-1 OS=Oryza sativa subsp. japonica OX=39947 GN=COPZ1 PE=2 SV=1                  | 0.571 | 11 | 1 | 177  | 19.4  | 4.73 | transport                                                                                                   |                                                                                                      | Os05g0461000; LOC4339020                                                                               |                                                                                                                                                                                   |
| Q5VRW2 | Transcription factor NIGTH1 OS=Oryza sativa subsp. japonica OX=39947 GN=NHO1 PE=1 SV=2               | 0.528 | 5  | 1 | 507  | 53    | 6.02 | cell organization and biogenesis; metabolic process; regulation of biological process; response to stimulus | DNA binding; protein binding                                                                         | Os01g0176700; LOC4326224                                                                               |                                                                                                                                                                                   |
| Q10HL3 | Endoribonuclease Dicer homolog 2a OS=Oryza sativa subsp. japonica OX=39947 GN=DCL2A PE=2 SV=1        | 0.5   | 1  | 1 | 1410 | 158.4 | 6.86 | metabolic process; regulation of biological process; response to stimulus                                   | catalytic activity; DNA binding; metal ion binding; nucleotide binding; protein binding; RNA binding | Os03g0583900; LOC4333337                                                                               |                                                                                                                                                                                   |
| O82451 | Probable glutathione S-transferase GSTF2 OS=Oryza sativa subsp.                                      | 0.5   | 9  | 1 | 215  | 24    | 6.13 | metabolic process                                                                                           | catalytic activity; protein binding                                                                  | Os01g0764000; LOC4326887                                                                               | Glutathione metabolism                                                                                                                                                            |

|        |                                                                                                    |       |    |   |      |       |      |                                                                            |                                                                                                                          |                             |                                                                                                                                                             |
|--------|----------------------------------------------------------------------------------------------------|-------|----|---|------|-------|------|----------------------------------------------------------------------------|--------------------------------------------------------------------------------------------------------------------------|-----------------------------|-------------------------------------------------------------------------------------------------------------------------------------------------------------|
|        | japonica OX=39947 GN=GSTF2 PE=1 SV=3                                                               |       |    |   |      |       |      |                                                                            |                                                                                                                          |                             |                                                                                                                                                             |
| Q9AUV6 | UDP-glucose 6-dehydrogenase 3<br>OS=Oryza sativa subsp. japonica<br>OX=39947 GN=UGD3 PE=2 SV=1     | 3.607 | 9  | 3 | 480  | 52.9  | 6.13 | metabolic process                                                          | catalytic activity;<br>nucleotide binding                                                                                | Os03g0757900;<br>LOC4334169 | Pentose and glucuronate<br>interconversions; Metabolic<br>pathways; Ascorbate and<br>aldarate metabolism; Amino<br>sugar and nucleotide sugar<br>metabolism |
| Q10NY2 | Protein TPR3 OS=Oryza sativa subsp.<br>japonica OX=39947 GN=TPR3 PE=1<br>SV=1                      | 2.898 | 3  | 3 | 1133 | 125.1 | 7.14 | regulation of<br>biological process                                        | protein binding                                                                                                          | Os03g0254700;<br>LOC4332285 |                                                                                                                                                             |
| Q06396 | ADP-ribosylation factor 1 OS=Oryza<br>sativa subsp. japonica OX=39947<br>GN=Os01g0813400 PE=2 SV=3 | 2.698 | 25 | 3 | 181  | 20.7  | 6.95 | regulation of<br>biological process;<br>response to stimulus;<br>transport | catalytic activity;<br>nucleotide binding;<br>protein binding;<br>signal transducer<br>activity; transporter<br>activity | Os01g0813400;<br>LOC4327591 | Endocytosis                                                                                                                                                 |
| Q76FS2 | Tubulin beta-8 chain OS=Oryza sativa<br>subsp. japonica OX=39947<br>GN=TUBB8 PE=2 SV=1             | 1.976 | 5  | 2 | 446  | 49.6  | 4.89 | cell organization and<br>biogenesis                                        | catalytic activity;<br>nucleotide binding;<br>structural molecule<br>activity                                            | Os03g0661300;<br>LOC4333632 | Phagosome                                                                                                                                                   |
| Q43594 | Tubulin beta-1 chain OS=Oryza sativa<br>subsp. japonica OX=39947<br>GN=TUBB1 PE=2 SV=2             | 1.976 | 5  | 2 | 447  | 50.3  | 4.83 | cell organization and<br>biogenesis                                        | catalytic activity;<br>nucleotide binding;<br>structural molecule<br>activity                                            | Os01g0282800;<br>LOC4326917 | Phagosome                                                                                                                                                   |
| P46265 | Tubulin beta-5 chain OS=Oryza sativa<br>subsp. japonica OX=39947<br>GN=TUBB5 PE=1 SV=1             | 1.976 | 5  | 2 | 447  | 50.1  | 4.83 | cell organization and<br>biogenesis; cellular<br>component movement        | catalytic activity;<br>nucleotide binding;<br>structural molecule<br>activity                                            | Os02g0167300;<br>LOC4328420 | Phagosome                                                                                                                                                   |
| Q76FS3 | Tubulin beta-6 chain OS=Oryza sativa<br>subsp. japonica OX=39947<br>GN=TUBB6 PE=2 SV=1             | 1.976 | 5  | 2 | 444  | 49.9  | 4.91 | cell organization and<br>biogenesis                                        | catalytic activity;<br>nucleotide binding;<br>structural molecule<br>activity                                            | Os05g0413200;<br>LOC4338790 | Phagosome                                                                                                                                                   |
| P37832 | Tubulin beta-7 chain OS=Oryza sativa<br>subsp. japonica OX=39947<br>GN=TUBB7 PE=2 SV=2             | 1.976 | 5  | 2 | 444  | 49.8  | 4.87 | cell organization and<br>biogenesis; cellular<br>component movement        | catalytic activity;<br>nucleotide binding;<br>structural molecule<br>activity                                            | Os03g0780600;<br>LOC4334309 | Phagosome                                                                                                                                                   |
| Q40665 | Tubulin beta-3 chain OS=Oryza sativa<br>subsp. japonica OX=39947<br>GN=TUBB3 PE=2 SV=2             | 1.976 | 5  | 2 | 446  | 50.1  | 4.83 | cell organization and<br>biogenesis                                        | catalytic activity;<br>nucleotide binding;<br>structural molecule<br>activity                                            | Os06g0671900;<br>LOC4341810 | Phagosome                                                                                                                                                   |
| Q8H7U1 | Tubulin beta-2 chain OS=Oryza sativa<br>subsp. japonica OX=39947<br>GN=TUBB2 PE=2 SV=1             | 1.976 | 5  | 2 | 447  | 50.2  | 4.83 | cell organization and<br>biogenesis                                        | catalytic activity;<br>nucleotide binding;<br>structural molecule<br>activity                                            | Os03g0105600;<br>LOC4331315 | Phagosome                                                                                                                                                   |
| P28752 | Tubulin alpha-1 chain OS=Oryza sativa<br>subsp. japonica OX=39947<br>GN=TUBA1 PE=1 SV=1            | 1.432 | 4  | 1 | 450  | 49.6  | 5.06 | cell organization and<br>biogenesis                                        | catalytic activity;<br>nucleotide binding;                                                                               | Os07g0574800;<br>LOC4343694 | Phagosome                                                                                                                                                   |

|        |                                                                                                                                                  |       |    |   |      |       |      |                                                                                 |                                                                                                               |                                                             |                                                                                                                                                                                      |
|--------|--------------------------------------------------------------------------------------------------------------------------------------------------|-------|----|---|------|-------|------|---------------------------------------------------------------------------------|---------------------------------------------------------------------------------------------------------------|-------------------------------------------------------------|--------------------------------------------------------------------------------------------------------------------------------------------------------------------------------------|
|        |                                                                                                                                                  |       |    |   |      |       |      |                                                                                 | structural molecule activity                                                                                  |                                                             |                                                                                                                                                                                      |
| Q2QLY5 | 5-methyltetrahydropteroyltriglutamate--homocysteine methyltransferase 1<br>OS=Oryza sativa subsp. japonica<br>OX=39947 GN=Os12g0623900 PE=2 SV=1 | 1.141 | 2  | 1 | 766  | 84.5  | 6.3  | metabolic process                                                               | catalytic activity;<br>metal ion binding                                                                      | Os12g0623900;<br>LOC4352832                                 | Selenocompound metabolism; Cysteine and methionine metabolism; Biosynthesis of secondary metabolites; Metabolic pathways; Biosynthesis of amino acids                                |
| POCH34 | Ubiquitin-60S ribosomal protein L40-1<br>OS=Oryza sativa subsp. japonica<br>OX=39947 GN=Ub-CEP52-1 PE=2 SV=1                                     | 0.612 | 12 | 1 | 129  | 14.8  | 9.92 | metabolic process                                                               | protein binding;<br>structural molecule activity                                                              | Os03g0234200;<br>LOC4332169;<br>Os09g0568400;<br>LOC4347896 | Ribosome                                                                                                                                                                             |
| POC031 | Ubiquitin-NEDD8-like protein RUB2<br>OS=Oryza sativa subsp. japonica<br>OX=39947 GN=RUB2 PE=2 SV=2                                               | 0.612 | 10 | 1 | 153  | 17.1  | 6.06 |                                                                                 | protein binding                                                                                               | Os06g0650100;<br>LOC4341684                                 |                                                                                                                                                                                      |
| Q9ARZ9 | Ubiquitin-40S ribosomal protein S27a-1<br>OS=Oryza sativa subsp. japonica<br>OX=39947 GN=RPS27AA PE=2 SV=1                                       | 0.612 | 10 | 1 | 155  | 17.7  | 9.77 | metabolic process                                                               | metal ion binding;<br>protein binding;<br>structural molecule activity                                        | Os01g0328400;<br>LOC4326977                                 | Ribosome                                                                                                                                                                             |
| POC030 | Ubiquitin-NEDD8-like protein RUB1<br>OS=Oryza sativa subsp. japonica<br>OX=39947 GN=RUB1 PE=2 SV=2                                               | 0.612 | 10 | 1 | 153  | 17.1  | 6.06 |                                                                                 | protein binding                                                                                               | Os09g0420800;<br>LOC4347085                                 |                                                                                                                                                                                      |
| Q58G87 | Polyubiquitin 3 OS=Oryza sativa subsp. japonica OX=39947 GN=UBQ3 PE=2 SV=2                                                                       | 0.612 | 17 | 1 | 381  | 42.7  | 7.58 | response to stimulus                                                            | protein binding                                                                                               | OSJNBa0089N06.4;<br>Os04g0628100;<br>LOC4337080             |                                                                                                                                                                                      |
| Q69LX2 | Endoribonuclease Dicer homolog 2b<br>OS=Oryza sativa subsp. japonica<br>OX=39947 GN=DCL2B PE=2 SV=2                                              | 0.5   | 1  | 1 | 1377 | 154.7 | 7.15 | metabolic process;<br>regulation of biological process;<br>response to stimulus | catalytic activity;<br>DNA binding; metal ion binding;<br>nucleotide binding;<br>protein binding; RNA binding | Os09g0315100;<br>LOC4346696                                 |                                                                                                                                                                                      |
| Q6K5G8 | Glyceraldehyde-3-phosphate dehydrogenase 3, cytosolic OS=Oryza sativa subsp. japonica OX=39947 GN=GAPC3 PE=2 SV=1                                | 6.657 | 9  | 3 | 337  | 36.5  | 7.88 | metabolic process                                                               | catalytic activity;<br>nucleotide binding                                                                     | Os02g0601300;<br>LOC4329892                                 | Biosynthesis of secondary metabolites; Metabolic pathways; Biosynthesis of amino acids; Carbon fixation in photosynthetic organisms; Glycolysis / Gluconeogenesis; Carbon metabolism |
| Q0DKY4 | S-adenosylmethionine synthase 1<br>OS=Oryza sativa subsp. japonica<br>OX=39947 GN=SAM1 PE=2 SV=1                                                 | 4.233 | 12 | 2 | 396  | 43.2  | 6.14 | metabolic process                                                               | catalytic activity;<br>metal ion binding;<br>nucleotide binding                                               | Os05g0135700;<br>LOC4337733                                 | Cysteine and methionine metabolism; Biosynthesis of secondary metabolites; Metabolic pathways; Biosynthesis of amino acids                                                           |
| Q9LGU6 | S-adenosylmethionine synthase 3<br>OS=Oryza sativa subsp. japonica<br>OX=39947 GN=METK3 PE=2 SV=1                                                | 4.233 | 12 | 2 | 396  | 43.3  | 5.41 | metabolic process                                                               | catalytic activity;<br>metal ion binding;<br>nucleotide binding                                               | Os01g0293000;<br>LOC4325163                                 | Cysteine and methionine metabolism; Biosynthesis of secondary metabolites;                                                                                                           |

|        |                                                                                                  |       |   |   |      |      |      |                                  |                                           |                             |                                                                                                                                              |
|--------|--------------------------------------------------------------------------------------------------|-------|---|---|------|------|------|----------------------------------|-------------------------------------------|-----------------------------|----------------------------------------------------------------------------------------------------------------------------------------------|
|        |                                                                                                  |       |   |   |      |      |      |                                  |                                           |                             | Metabolic pathways;<br>Biosynthesis of amino acids                                                                                           |
| Q5NBT9 | Protein TPR1 OS= <i>Oryza sativa</i> subsp. japonica OX=39947 GN=TPR1 PE=1 SV=1                  | 2.042 | 2 | 2 | 1129 | 125  | 7.18 | regulation of biological process | protein binding                           | Os01g0254100;<br>LOC4327709 |                                                                                                                                              |
| Q75GS4 | UDP-glucose 6-dehydrogenase 1 OS= <i>Oryza sativa</i> subsp. japonica OX=39947 GN=UGD1 PE=3 SV=1 | 1.223 | 3 | 1 | 481  | 52.3 | 6.04 | metabolic process                | catalytic activity;<br>nucleotide binding | Os03g0425600;<br>LOC4333156 | Pentose and glucuronate interconversions; Metabolic pathways; Ascorbate and aldarate metabolism; Amino sugar and nucleotide sugar metabolism |
| B7F958 | UDP-glucose 6-dehydrogenase 2 OS= <i>Oryza sativa</i> subsp. japonica OX=39947 GN=UGD2 PE=2 SV=1 | 1.223 | 3 | 1 | 482  | 53.1 | 7.18 | metabolic process                | catalytic activity;<br>nucleotide binding | Os03g0604200;<br>LOC4333410 | Pentose and glucuronate interconversions; Metabolic pathways; Ascorbate and aldarate metabolism; Amino sugar and nucleotide sugar metabolism |
| P0C540 | Actin-7 OS= <i>Oryza sativa</i> subsp. japonica OX=39947 GN=ACT7 PE=3 SV=1                       | 0.84  | 4 | 1 | 376  | 41.6 | 5.39 |                                  | nucleotide binding                        | Os01g0866100;<br>LOC4325068 |                                                                                                                                              |
| Q10DV7 | Actin-1 OS= <i>Oryza sativa</i> subsp. japonica OX=39947 GN=ACT1 PE=2 SV=1                       | 0.84  | 4 | 1 | 377  | 41.8 | 5.49 |                                  | nucleotide binding                        | Os03g0718100;<br>LOC4333919 |                                                                                                                                              |
| Q10AZ4 | Actin-3 OS= <i>Oryza sativa</i> subsp. japonica OX=39947 GN=ACT3 PE=2 SV=1                       | 0.84  | 4 | 1 | 377  | 41.7 | 5.49 |                                  | nucleotide binding                        | Os03g0836000;<br>LOC4334702 |                                                                                                                                              |
